# Supplementary material for: Smart supramolecular photoresponsive gelator with long-alkyl chain azobenzene incorporated sugar derivatives for recycling aromatic solvents and sequestration of cationic dyes
Source: Royal Society of Chemistry journal article supplement (doi:10.1039/d2sm01367c), 2022-01-01
Supplement: d2sm01367c1.pdf [file d2sm01367c1.pdf]

**Supporting Information**

**Smart Supramolecular Photoresponsive Gelator with Long-alkyl chain Azobenzene Incorporated Sugar Derivatives for Recycling Aromatic Solvents and Sequestration of Cationic Dyes**

*V. Rebecca Jenifer and Thangamuthu Mohan Das\**

*Department of Chemistry, School of Basic and Applied sciences, Central University of Tamil Nadu (CUTN), Thiruvarur 610 005, India*

---

\*Corresponding author. Tel.: +91 9965048959

E-mail address: tmohandas@cutn.ac.in (T. Mohan Das).

---

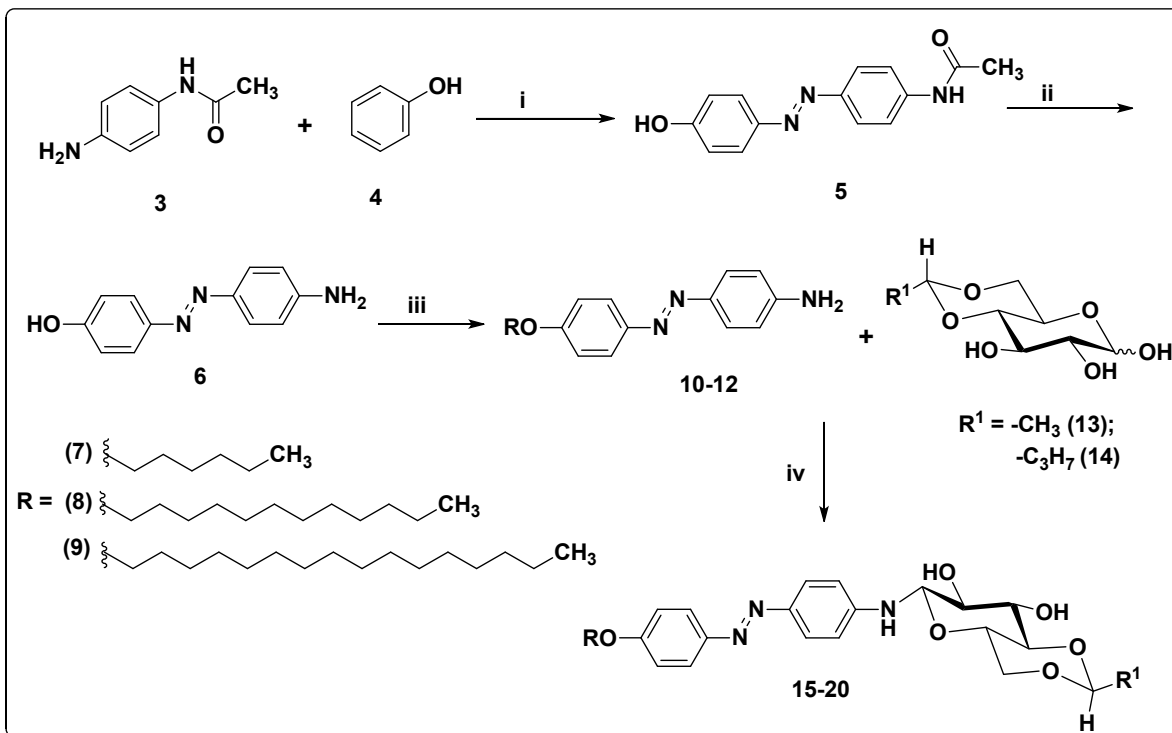

**Scheme S1** Synthetic route of long-chain azobenzene based sugar derivatives (**15-20**). Reagents and reaction conditions: i)  $\text{NaNO}_2$ ,  $\text{H}_2\text{O}:\text{HCl}$ ,  $\text{NaOH}$ ,  $\text{Na}_2\text{CO}_3$ , 97%; ii)  $\text{KOH}$ ,  $90^\circ\text{C}$ , ethanol, 1h, 75%; iii)  $\text{R-Br}$  (**7-9**),  $\text{K}_2\text{CO}_3$ ,  $\text{DMF}$ , 90-94%; iv) 4,6-O-protected D-glucose (**13** and **14**), ethanol, rt, 78-86%.

**Table S1:** Gelation test results for the compounds (**15-20**)

| Status of compound (CGC%) (mg/mL) |    |    |    |    |    |    |
|-----------------------------------|----|----|----|----|----|----|
| Solvent                           | 15 | 16 | 17 | 18 | 19 | 20 |
| Hexane                            | I  | I  | I  | I  | I  | I  |
| $\text{H}_2\text{O}$              | I  | I  | I  | I  | I  | I  |
| Cyclohexane                       | I  | I  | I  | I  | I  | I  |
| DCM                               | S  | S  | S  | S  | S  | S  |
| Ethanol                           | S  | S  | S  | S  | S  | S  |
| Methanol                          | S  | S  | S  | S  | S  | S  |
| Ethyl acetate                     | S  | S  | S  | S  | S  | S  |

|                          |         |         |         |         |         |         |
|--------------------------|---------|---------|---------|---------|---------|---------|
| DMF                      | S       | S       | S       | S       | S       | S       |
| DMF + Glycerol (1:1)     | G (3)   |
| DMSO                     | S       | S       | S       | S       | S       | S       |
| DMSO + Glycerol (1:1)    | G (3)   |
| THF                      | S       | S       | S       | S       | S       | S       |
| Diethyl ether            | S       | S       | S       | S       | S       | S       |
| Chloroform               | PG      | PG      | PG      | PG      | PG      | PG      |
| Acetonitrile             | G (0.5) | G (0.5) | G (0.4) | G (0.4) | G(0.4)  | G(0.4)  |
| Toluene                  | G(0.6)  | G (0.5) | G (0.5) | G (0.4) | G (0.4) | G (0.4) |
| Benzene                  | G (0.6) | G (0.6) | G (0.5) | G (0.5) | G (0.5) | G (0.5) |
| NO <sub>2</sub> -benzene | S       | S       | S       | S       | S       | S       |
| Glycerol                 | I       | I       | I       | I       | I       | I       |
| 1-Heptanol               | G (1.5) | G (1.5) | G (1.5) | G (1.4) | G (1.3) | G (1.3) |
| t-butyl alcohol          | S       | S       | S       | S       | S       | S       |
| 1-butanol                | P       | P       | P       | P       | P       | P       |
| 1,2-dichloroethane       | S       | S       | S       | S       | S       | S       |
| 1,2-dichlorobenzene      | G (1.6) | G (1.6) | G (1.6) | G (1.6) | G (1.5) | G (1.5) |
| 1,2-dichloromethane      | S       | S       | S       | S       | S       | S       |
| 2-methoxy ethanol        | S       | S       | S       | S       | S       | S       |
| 2-propanol               | P       | P       | P       | P       | P       | P       |
| Petrol                   | S       | S       | S       | S       | S       | S       |
| Kerosene                 | P       | P       | P       | P       | P       | P       |
| Coconut oil              | S       | S       | S       | S       | S       | S       |

S- soluble, G- stable gel formed at RT, PG- partial gel formation at RT, P- precipitate, I- insoluble. CGC- critical gelation concentration (mg/mL), which corresponds to the minimum concentration of a gelator necessary to induce gelation of the solvent.

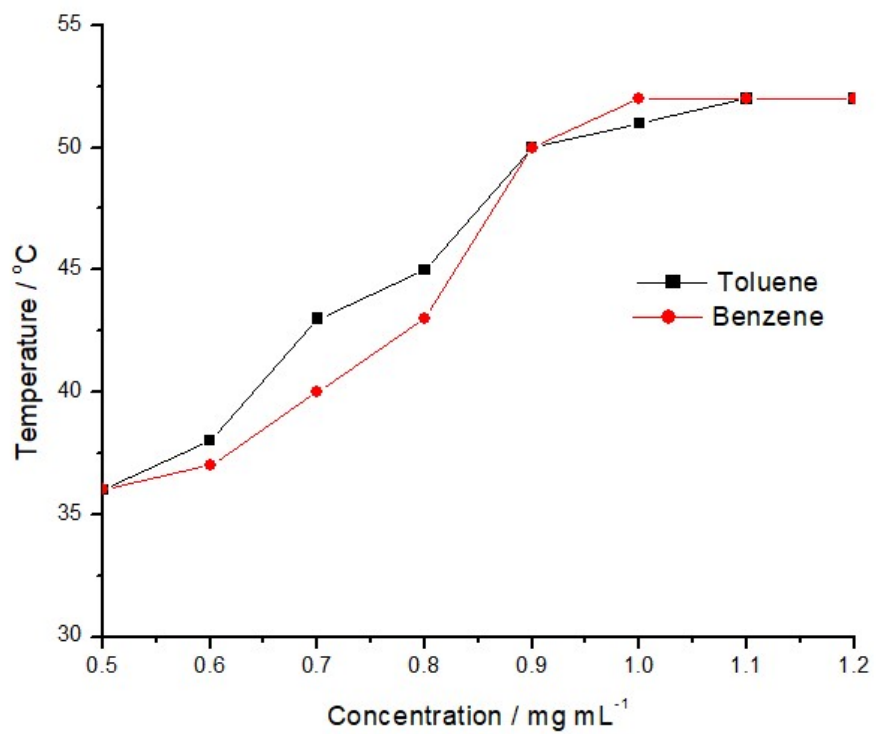

**Fig. S1** Concentration-dependent phase-transition temperature ( $T_{gel}$ ) of compound **18** in toluene and benzene.

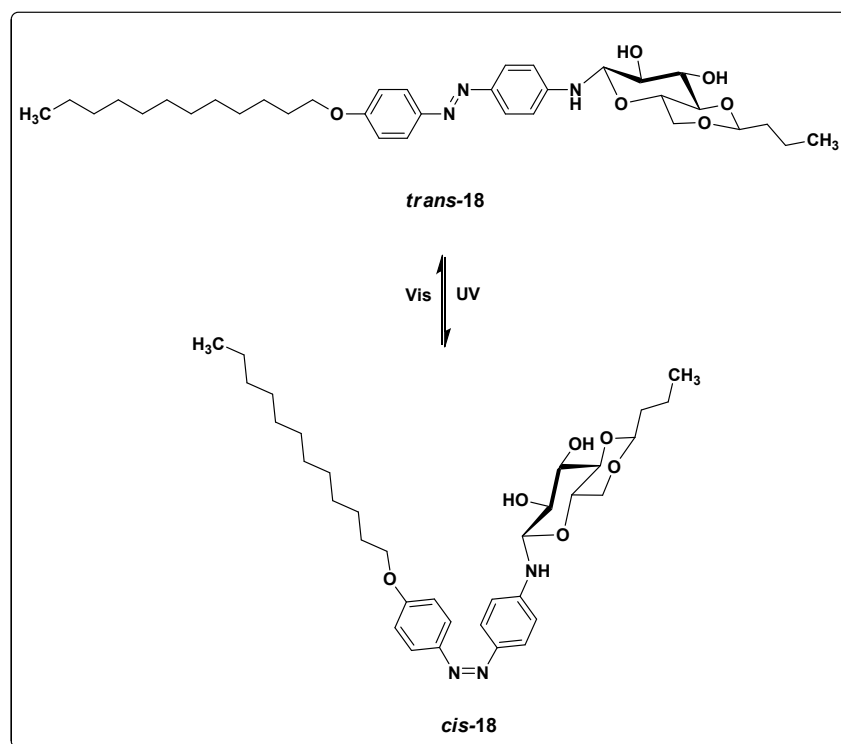

**Scheme S2** Schematic representation of UV-Vis induced *trans*–*cis* isomerization of gelator **18**.

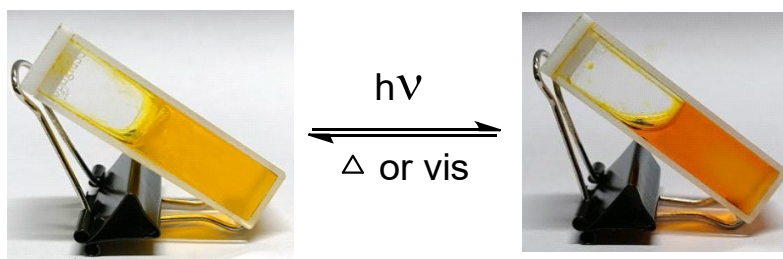

**Fig. S2** Gel-sol transition photograph of compound **18** in toluene.

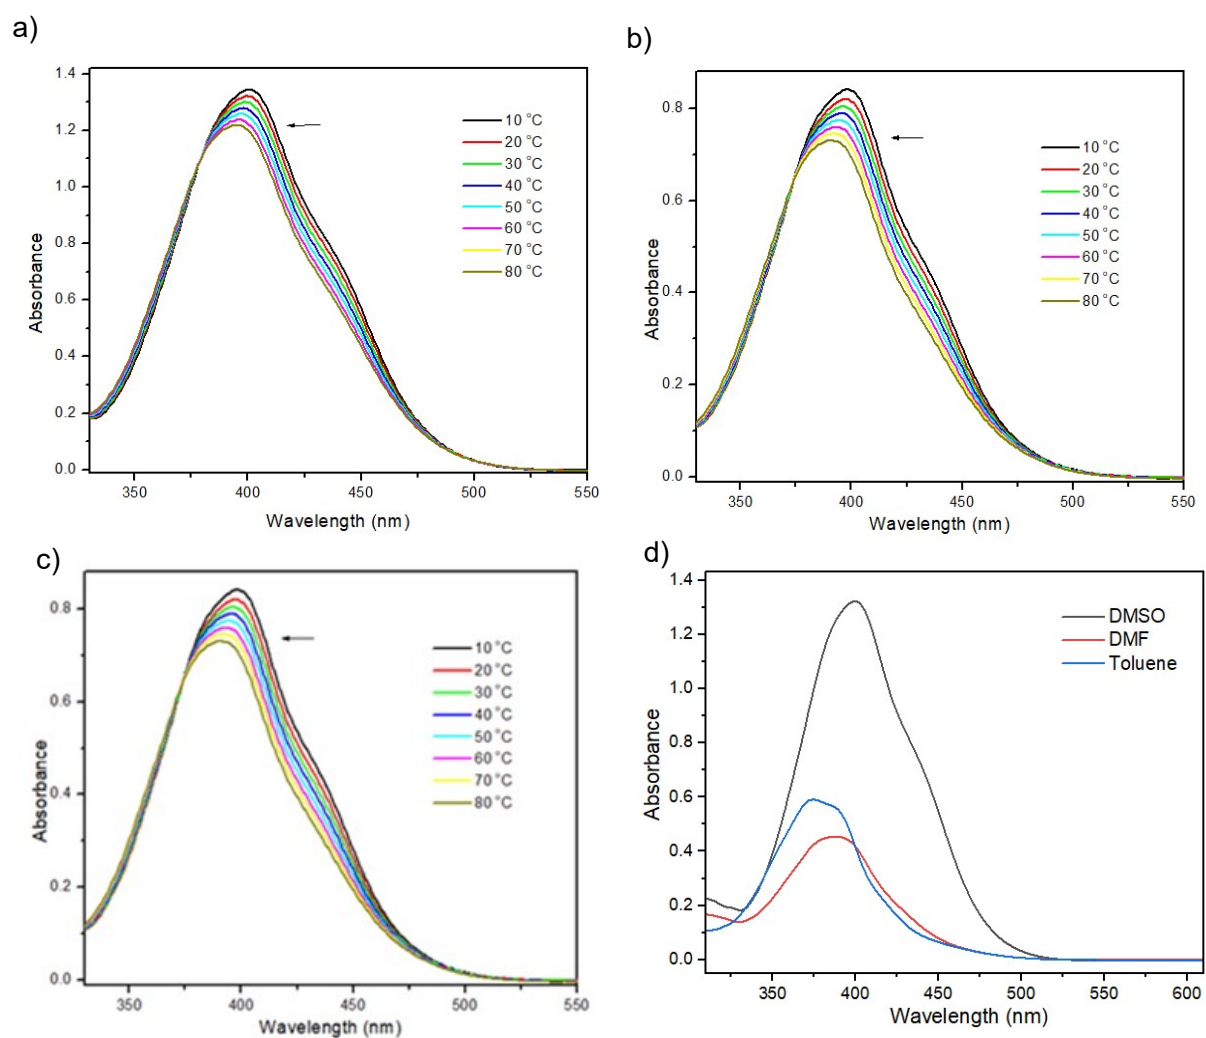

**Fig. S3** a) Temperature-dependent absorption studies of compound **18** ( $1 \times 10^{-5}$  M) in DMSO (a), toluene (b) and DMF (c); b) Solvatochromism behaviour of compound **18** in different solvents such as DMSO, DMF, Toluene.

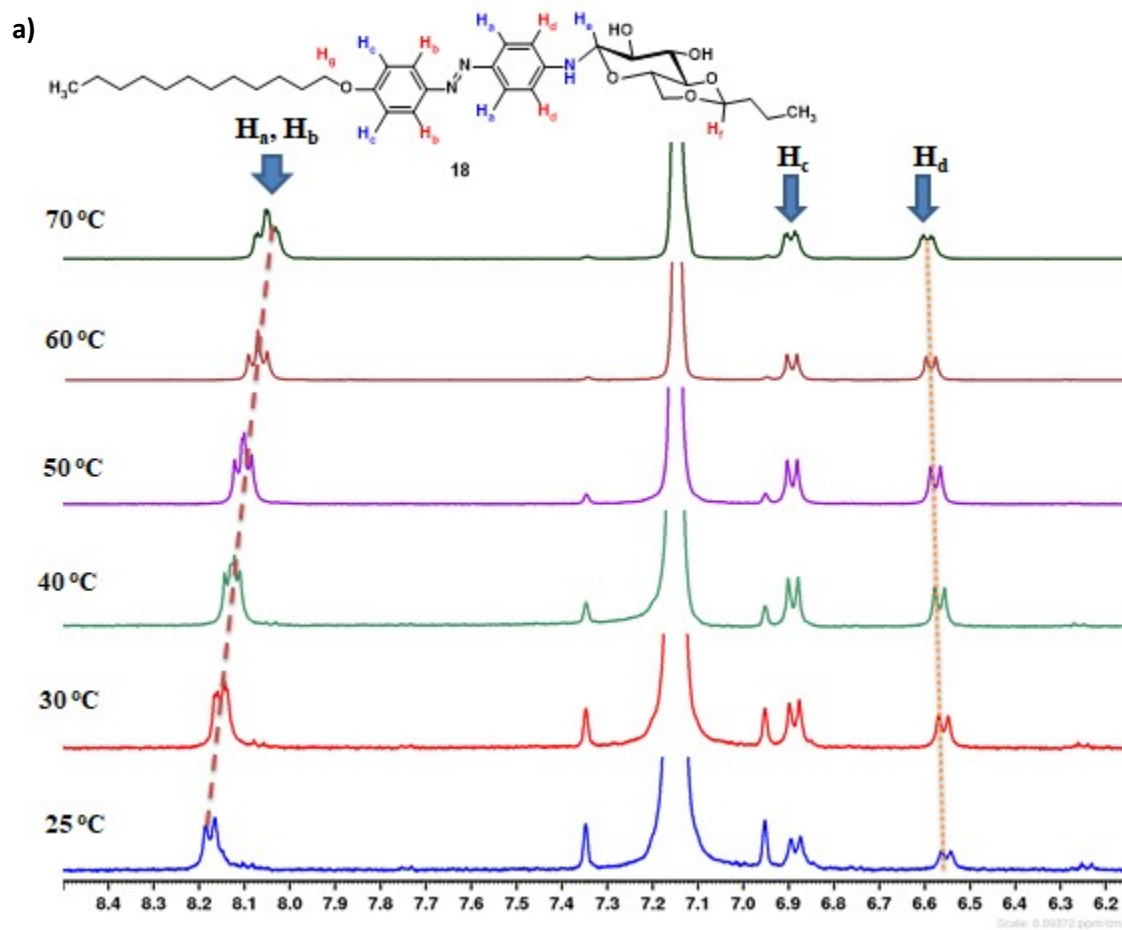

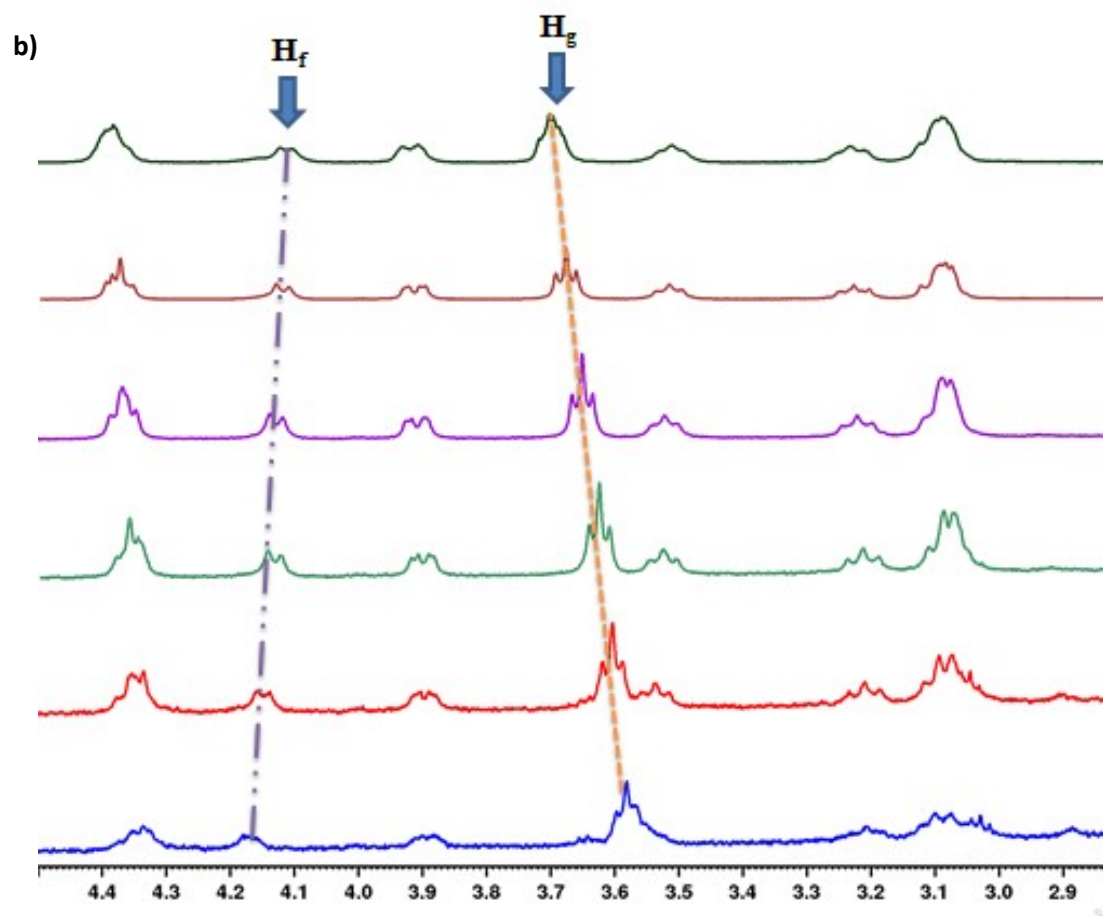

**Fig. S4** Partial  $^1\text{H}$  NMR studies of compound **18** (10 mg/ml) in Benzene- $\text{d}_6$  at temperatures of 25 °C, 30 °C, 40 °C, 50 °C, 60 °C, 70 °C, and 80 °C; a) aromatic region and b) saccharide region.

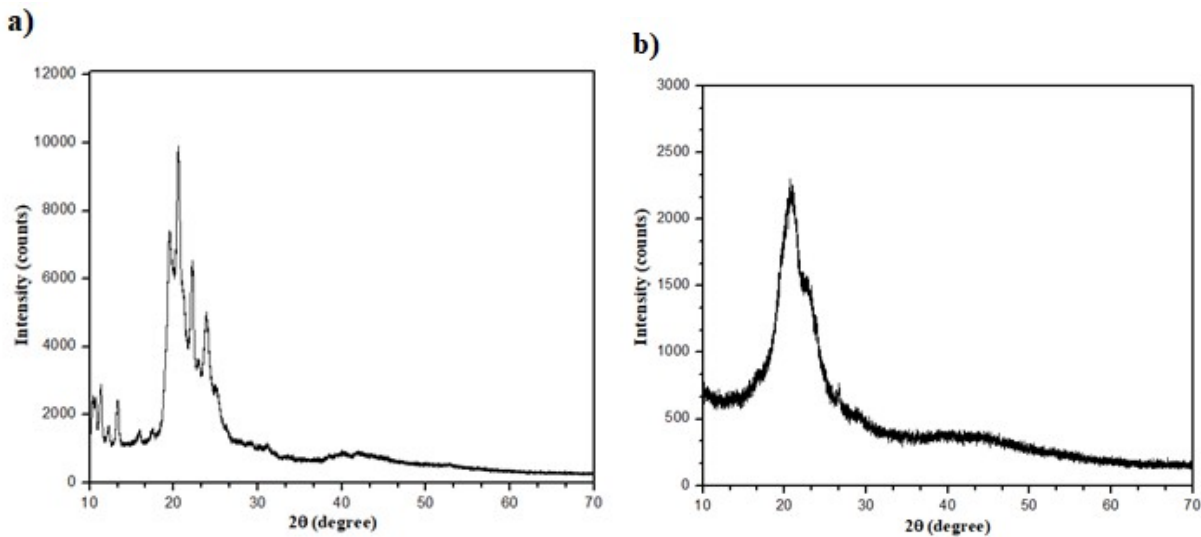

**Fig. S5** PXRD patterns of compound **18** a) powder state and b) xerogel state (from its toluene gel) at room temperature.

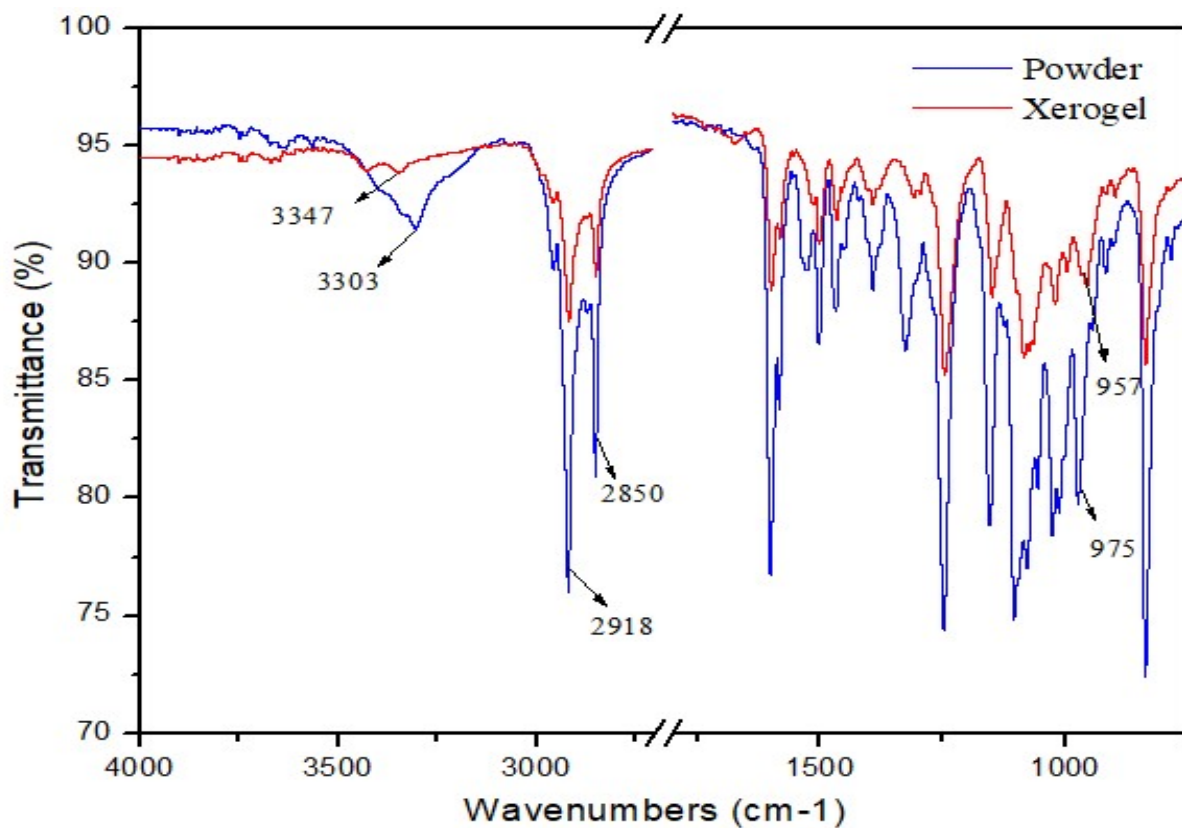

**Fig. S6** FT-IR spectra of compound **18** in powder state and xerogel state (from its toluene gel)



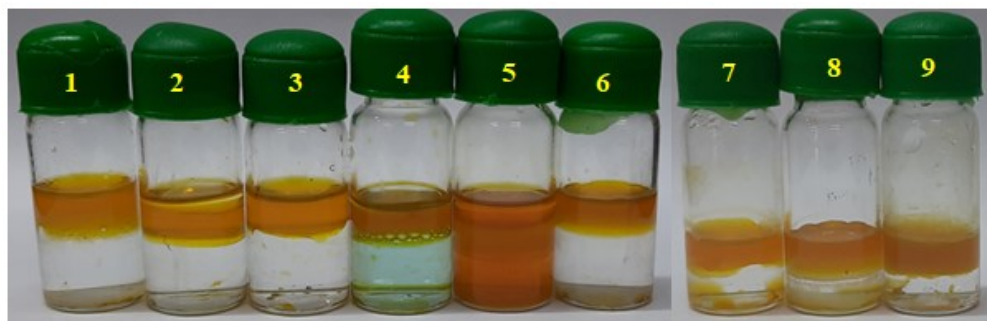

**Fig. S7** Photograph showing the phase-selective gelation of compound **18** from a mixture of benzene and aqueous mixture (1:2, v/v) in the presence of 1) tap water, 2) sat. NaCl, 3) sat. CaCl<sub>2</sub>, 4), CuSO<sub>4</sub>, 5) FeCl<sub>3</sub>, 6) ZnCl<sub>2</sub>, 7) tetrabutyl ammonium sulphate, 8) tetrabutyl ammonium chloride and 9) tetrabutyl ammonium bromide.

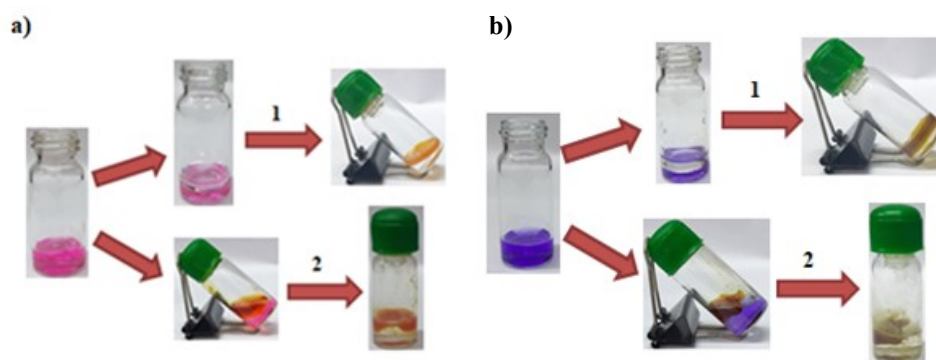

**Fig. S8** Photographs of dyes removed from aqueous solution by PSG **18** in different methods. a) RhB and b) CV

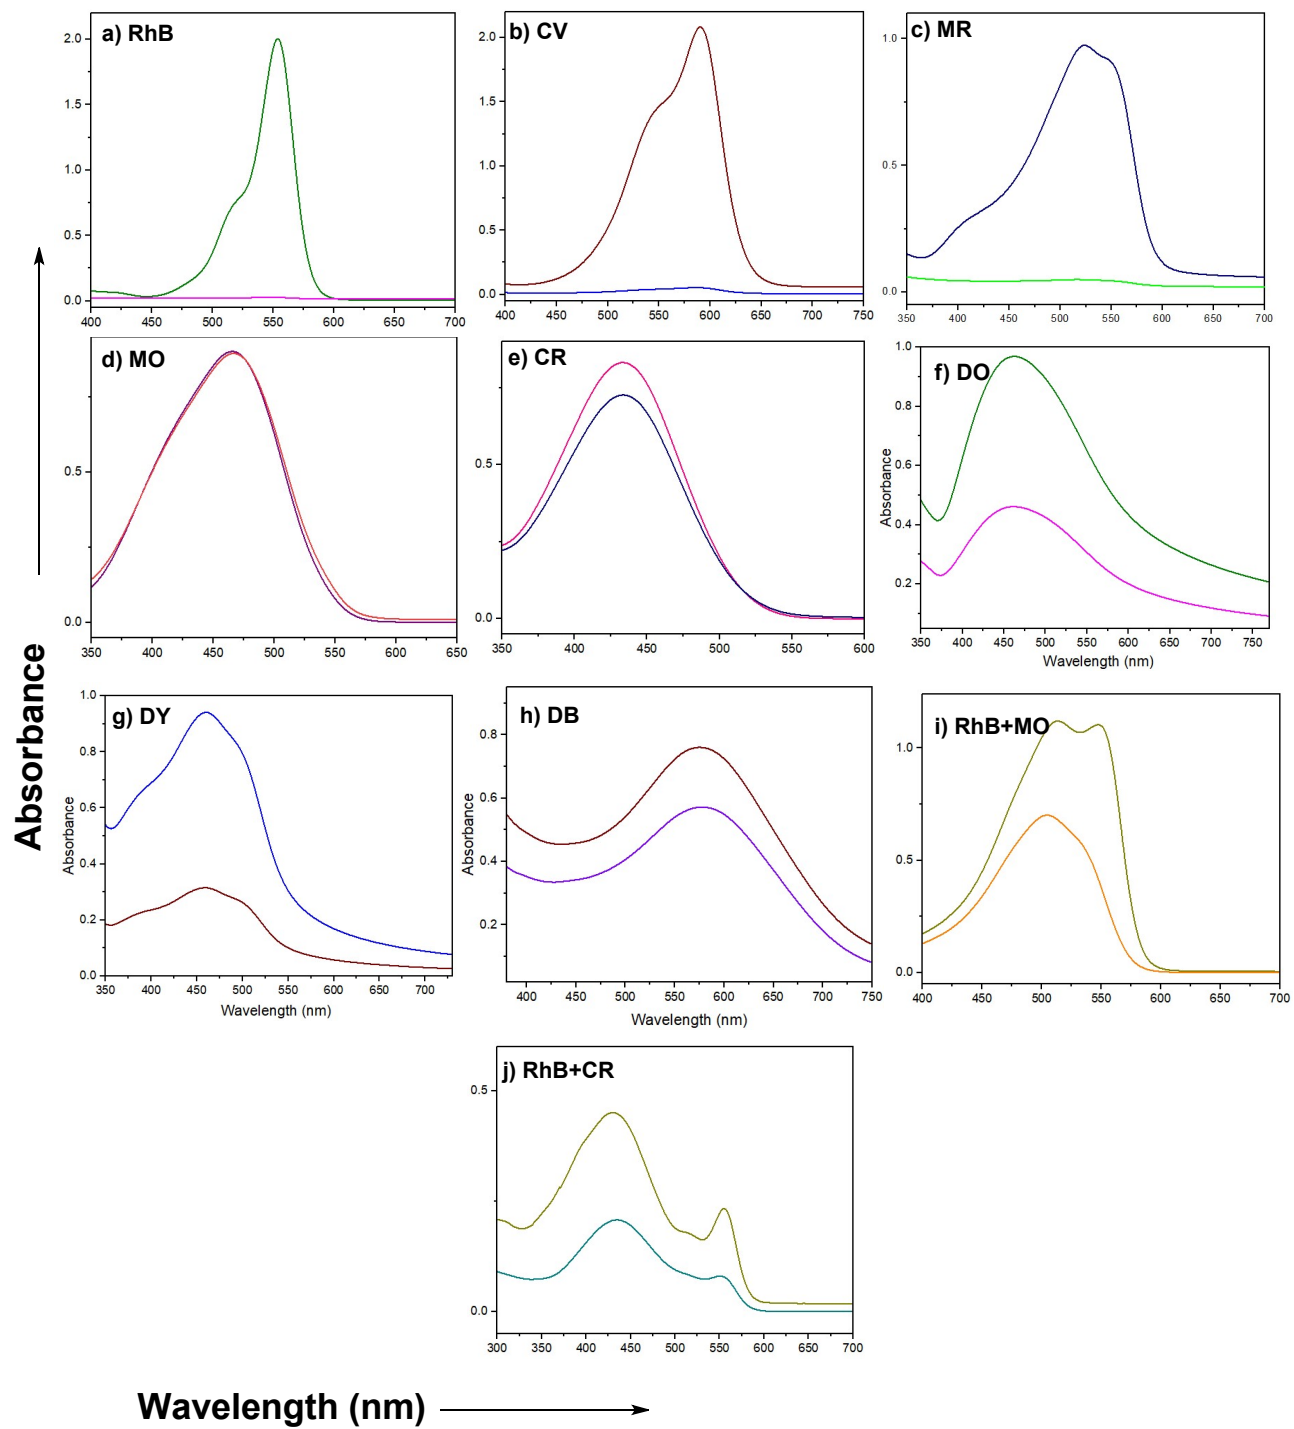

**Fig. S9** UV-Vis spectra representing dye adsorption by compound **18**, before and after adsorption (24h) by using benzene gel, a) RhB, b) CV, c) MR, d) MO, e) CR, f) DO, g) DY, h) DB, i) RhB/CR, and j) RhB/MO.

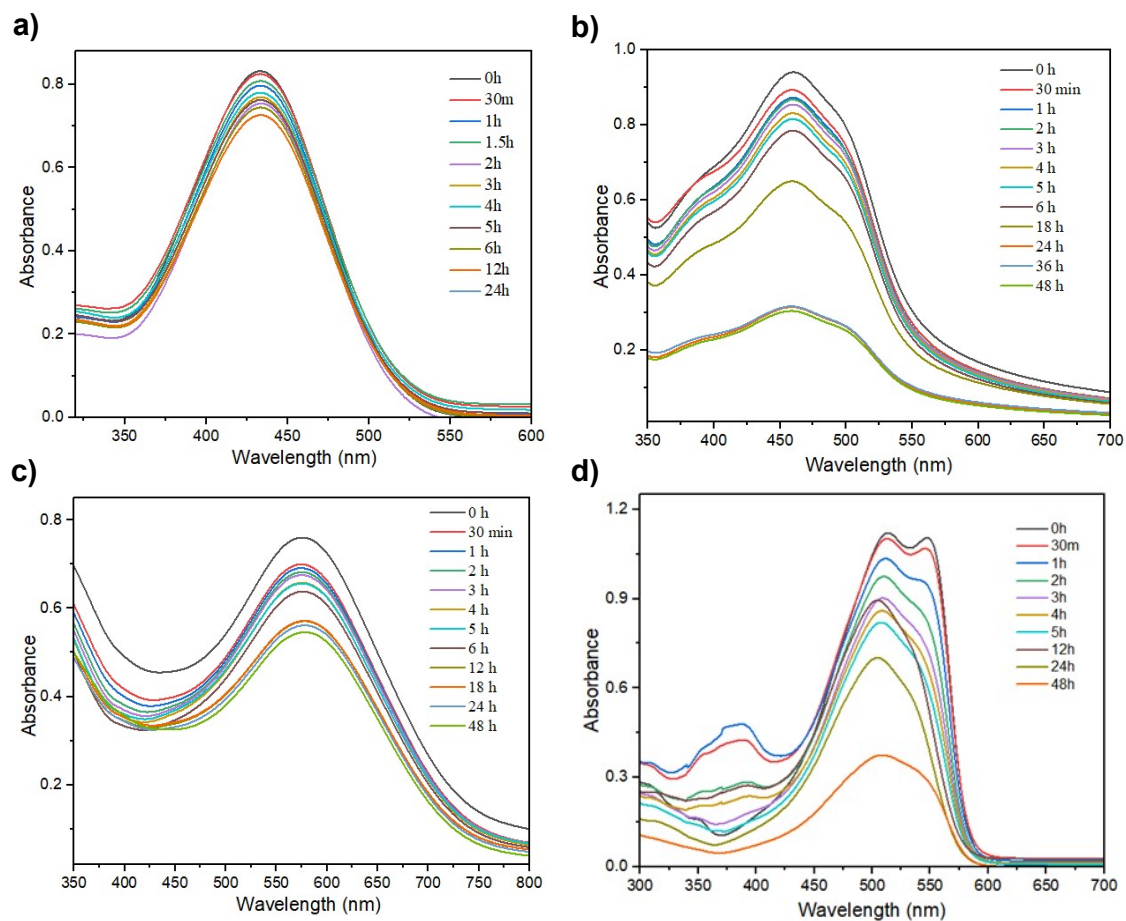

**Fig.S10** a) CR, b) DY, c) DB and d) RhB + MO mixture (1:1, v/v).

**Table S2** Dye absorption efficiencies towards by benzene gel of compound **18** with various cationic and anionic dyes

| Dye         | Dye structure     | Nature of the dye molecules | Efficiency (%) |
|-------------|-------------------|-----------------------------|----------------|
| Rhodamine B | $\text{Cl}^-$<br> | Cationic                    | 98             |

|                                |                                                                                     |                       |    |
|--------------------------------|-------------------------------------------------------------------------------------|-----------------------|----|
| Crystal Violet                 | 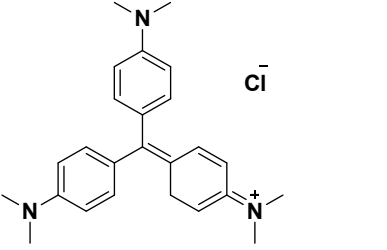   | Cationic              | 97 |
| Methyl red                     |    | Cationic              | 92 |
| Methyl orange                  |    | Anionic               | 8  |
| Cresol red                     |   | Anionic               | 12 |
| Rhodamine B +<br>Cresol red    | -                                                                                   | Cationic +<br>Anionic | 58 |
| Rhodamine B +<br>Methyl orange | -                                                                                   | Cationic +<br>Anionic | 65 |
| Disperse Orange<br>25          |  | Non-ionic             | 54 |
| Disperse Yellow<br>42          |  | Non-ionic             | 68 |
| Disperse Black 7               |  | Non-ionic             | 28 |

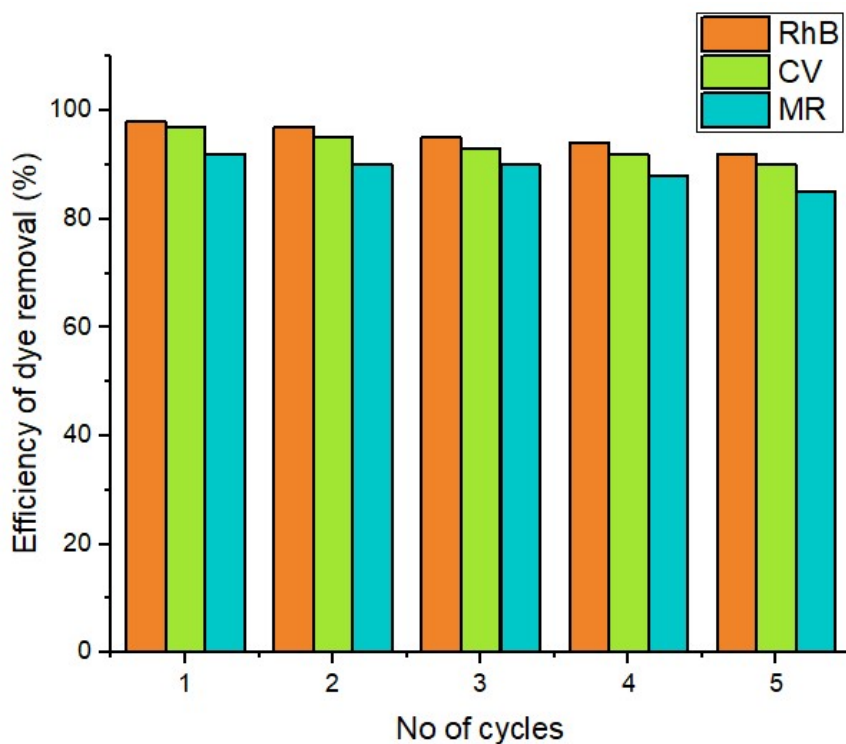

**Fig. S11** Bar diagram showing the reusability of gelator molecule **18** after absorption of dyes (Rhodamine B, Crystal Violet and Methyl red).

### ***Materials and Characterization***

Octyl bromide, dodecyl bromide, hexadecyl bromide, and potassium carbonate were purchased from Sigma Aldrich Pvt Ltd, USA with high purity. The materials purchased from SRL, Merck India are D-glucose, sodiumnitrite, sodiumcarbonate, sodiumhydroxide, and sodiumsulphate. The reagents such as ethanol, dimethylformamide (DMF), ethylacetate, concentrated hydrochloricacid, and other solvents were purchased from Merck, India in high purity and were used without any further purification. The reactions were monitored under thin layer chromatography (TLC) and were purified using columnchromatography which was performed on silica gel (100-200 mesh). The structures of the synthesized compounds were determined by using BRUKER 400 MHz Nuclear Magnetic Resonance (NMR) technique through the observed chemical shift of nuclei. The absorption spectra of the sample were recorded by JascoV-670 UV-NIR spectrophotometer and the corresponding excitation wavelength was noted for the sample. High-resolution mass spectroscopy was measured on Thermo Scientific Exactive™ Plus

Orbitrap Mass Spectrometer. Powder X-ray Diffraction was obtained on a PANalytical Empyrean-3. FE-SEM analysis was measured on FESEM: Quattro S, FEI Company of USA (S.E.A) PTE LTD, Singapore.

**Synthesis of compound 5:**

To a 4-aminoacetanilide **3** (3 g, 20 mmol), a mixture of 50 mL of water and 9 mL of hydrochloric acid (5:1) was added and kept in an ice-cold condition. Meanwhile, sodiumnitrite (2 g, 29 mmol) dissolved in 50 mL of water was also kept in ice-cold condition. Simultaneously, the sodium nitrite solution was slowly added to the mixture containing 4-aminoacetanilide dropwise. This led to the formation of a diazonium ion. In a separate round bottom flask containing a mixture of sodiumcarbonate (8 g, 75 mmol), sodiumhydroxide (1.04 g, 25 mmol), and phenol **4** (2.7 g, 21 mmol) was dissolved in 50 mL of water and kept in the ice bath. In the meantime, the diazonium mixture was added to the reaction mixture dropwise under stirring. The reaction was monitored through TLC. The resultant orange color precipitate thus obtained was acidified with conc. hydrochloric acid until the pH becomes neutral. Then, the precipitate was washed with water and dried for one day to give an orange solid. The crude was purified by column chromatography (SiO<sub>2</sub>, hexane/EtOAc, 1 : 1), and it was obtained as orange solid in 97% yield; <sup>1</sup>H NMR (400 MHz, DMSO-d<sub>6</sub>+CDCl<sub>3</sub>): δ 10.15 (s, 2H, Ar-H), 7.75 (s, 5H, Ar-H, -NH), 6.90 (d, J = 8.0 Hz, 2H, Ar-H), 3.47 (s, 1H, -OH), 2.08 (s, 3H, -CH<sub>3</sub>); <sup>13</sup>C NMR (100 MHz, DMSO-d<sub>6</sub>+CDCl<sub>3</sub>): δ 168.5, 160.4, 147.6, 145.3, 141.3, 124.3, 122.9, 119.1, 115.7, 24.1. HR-MS calcd. for C<sub>14</sub>H<sub>13</sub>N<sub>3</sub>O<sub>2</sub> [M]<sup>+</sup> 256.10805, Found 256.10872 (M + H)<sup>+</sup>.

**Synthesis of compound 6:** To an absolute ethanolic solution of compound **5** (1 g, 1 eq.), potassiumhydroxide (6.26 g, 7 eq.) dissolved in 7:3 of ethanol/water was added and reflux for 1hr at 90 °C. The product formation was monitored by TLC. Once the reaction gets completed it was allowed to cool at room temperature, then extracted three times with ethyl acetate and dried over anhydrous sodium sulfate. The desired product thus obtained is a dark brown color precipitate and it was purified by column chromatography (SiO<sub>2</sub>, hexane/EtOAc, 2 : 1), and it was obtained as dark orange solid in 75% yield; <sup>1</sup>H NMR (400 MHz, DMSO-d<sub>6</sub>+CDCl<sub>3</sub>): δ 7.66-7.59 (dd, J = 8.4 Hz, 8.6 Hz, 4H, Ar-H), 6.87 (d, J = 8.4 Hz, 2H, Ar-H), 6.65 (d, J = 8.4 Hz, 2H, Ar-H),

5.85 (s, 2H, -NH), 3.43 (s, 1H, -OH);  $^{13}\text{C}$  NMR (100 MHz, DMSO- $d_6$ + $\text{CDCl}_3$ ):  $\delta$  159.1, 151.8, 145.5, 142.9, 124.4, 123.6, 115.6, 113.7, 113.4. HR-MS calcd. for  $\text{C}_{12}\text{H}_{11}\text{N}_3\text{O}$   $[\text{M}]^+$  214.09749, Found 214.09781 (M + H) $^+$ .

**General procedure for the synthesis of compounds (10-12)**

A mixture of 4-((4-aminophenyl)diazenyl)phenol **6** (4.7 mmol) and excess anhydrous potassium carbonate (6.1 mmol) were dissolved in DMF and alkylbromide, **5-7** (7 mmol) was added to the reaction mixture and reflux for 1 hr at 80 °C. The reaction was monitored through TLC, the product was transferred to ice and extracted three times with ethylacetate and dried over anhydrous sodium sulfate. Then, the product was purified by column chromatography on silica gel with hexane/ethylacetate (8:2, v/v) as eluent to give desired pure product as a yellow color powder.

**Physicochemical and spectral data for compound, 10:** Yield= 94 %;  $^1\text{H}$  NMR (400 MHz,  $\text{CDCl}_3$ ):  $\delta$  7.83 (d,  $J$  = 9.2 Hz, 2H, Ar-H), 7.76 (d,  $J$  = 8.8 Hz, 2H, Ar-H), 6.97 (d,  $J$  = 9.2 Hz, 2H, Ar-H), 6.73 (d,  $J$  = 8.8 Hz, 2H, Ar-H), 4.032-3.99 (m, 4H, Ali-OCH $_2$ , -NH $_2$ ), 1.84-1.77 (m, 2H, Ali-H), 1.60 (s, 1H, Ali-H), 1.47 (m, 2H, Ali-H), 1.29 (m, 7H, Ali-H), 0.89 (t,  $J$  = 6.9 Hz, 3H, -CH $_3$ );  $^{13}\text{C}$  NMR (100 MHz,  $\text{CDCl}_3$ ):  $\delta$  160.9, 149.1, 147.1, 145.8, 124.7, 124.2, 114.9, 114.7, 68.4, 31.9, 29.5, 29.4, 29.4, 26.2, 22.8, 14.3.

**Physicochemical and spectral data for compound, 11:** Yield= 90 %;  $^1\text{H}$  NMR (400 MHz,  $\text{CDCl}_3$ )  $\delta$  7.83 (d,  $J$  = 10.4 Hz, 2H, Ar-H), 7.77 (d,  $J$  = 8.8 Hz, 2H, Ar-H), 6.97 (d,  $J$  = 8.9 Hz, 2H, Ar-H), 6.73 (d,  $J$  = 8.8 Hz, 2H, Ar-H), 4.032-3.99 (m, 4H, Ali-OCH $_2$ , -NH $_2$ ), 1.84-1.77 (m, 2H, Ali-H), 1.64 (s, 1H, Ali-H), 1.50-1.43 (m, 2H, Ali-H), 1.37-1.31 (m, 15H, Ali-H), 0.89 (t,  $J$  = 6.8 Hz, 3H, -CH $_3$ );  $^{13}\text{C}$  NMR (100 MHz,  $\text{CDCl}_3$ )  $\delta$  161.0, 149.1, 147.2, 145.9, 124.8, 124.2, 114.9, 114.8, 68.5, 32.1, 29.9, 29.8, 29.6, 29.5, 29.4, 26.2, 22.9, 14.3. HR-MS calcd. for  $\text{C}_{24}\text{H}_{36}\text{N}_3\text{O}$   $[\text{M}]^+$  382.28458, Found 382.28529 (M + H) $^+$ .

**Physicochemical and spectral data for compound, 12:** Yield= 90 %;  $^1\text{H}$  NMR (400 MHz,  $\text{CDCl}_3$ )  $\delta$  7.83 (d,  $J$  = 8.9 Hz, 2H, Ar-H), 7.76 (d,  $J$  = 8.7 Hz, 2H, Ar-H), 6.97 (d,  $J$  = 9 Hz, 2H, Ar-H), 6.73 (d,  $J$  = 8.8 Hz, 2H, Ar-H), 4.032-3.98 (m, 4H, Ali-OCH $_2$ , -NH $_2$ ), 1.84-1.77 (m, 2H, Ali-H), 1.61 (s, 1H, Ali-H), 1.49-1.45 (m, 2H, Ali-H), 1.37-1.26 (m, 23H, Ali-H), 0.88 (t,  $J$  = 6.8 Hz, 3H, Ali-CH $_3$ );  $^{13}\text{C}$  NMR (100

MHz, CDCl<sub>3</sub>):  $\delta$  160.8, 148.9, 147.0, 145.6, 124.9, 124.6, 124.3, 124.0, 115.0, 114.7, 114.6, 68.3, 32.8, 31.9, 29.7, 29.6, 29.4, 29.2, 26.0, 25.7, 22.7, 14.1. HR-MS cald. for C<sub>28</sub>H<sub>44</sub>N<sub>3</sub>O [M]<sup>+</sup>, 438.34789, Found 438.34832 (M + H)<sup>+</sup>.

**General procedure for the synthesis of N-glycosyl amines (15-20)**

To a solution of 1.0 mmol of the 4,6-O-protected- $\beta$ -D-glucopyranose (**13/14**) in 10 ml of absolute ethanol, was added 1.2 mmol of azobenzene based amines (**10-12**). The reaction was then stirred at room temperature, the reactants dissolved within 5-10 minutes. The completion of the reaction was confirmed through the TLC. The solid which separates was filtered off, washed several times with ethanol and diethyl ether to get desired pure product as bright yellow powder.

**Physicochemical and spectral data for compound, 15:** Yield= 86%; <sup>1</sup>H NMR (400 MHz, CDCl<sub>3</sub>+DMSO-*d*<sub>6</sub>):  $\delta$  7.76 (dd, *J* = 8.4 Hz, *J* = 6.3 Hz, 4H, Ar-H), 6.89 (dd, *J* = 8.7 Hz, 2H, Ar-H), 6.40 (m, 2H, Ar-H), 5.23-5.12 (m, 2H, Sac-H), 4.78-4.64 (m, 2H, -NH, Sac-H), 4.29-4.01 (m, 3H, Sac-H, Ano-H), 4.02 (t, *J* = 6.4 Hz, 2H, O-CH<sub>2</sub>), 3.69-3.46 (m, 6H, Sac-H), 2.16 (m, 1H, Ali-H), 1.82-1.78 (m, 2H, Ali-H), 1.48-1.29 (m, 10H, Ali-H), 0.89 (t, *J* = 6.74 Hz, 3H, Ali-CH<sub>3</sub>); <sup>13</sup>C NMR (100 MHz, CDCl<sub>3</sub>+DMSO- *d*<sub>6</sub>):  $\delta$  160.4, 148.9, 146.5, 145.0, 124.1, 123.6, 114.3, 113.2, 99.1, 99.0, 92.9, 85.6, 82.8, 80.9, 80.2, 73.7, 73.6, 73.1, 71.5, 70.2, 68.3, 67.9, 66.8, 61.8, 31.4, 29.0, 28.8, 25.6, 22.3, 20.2, 13.9; HR-MS cald. for C<sub>28</sub>H<sub>39</sub>N<sub>3</sub>O<sub>6</sub> [M]<sup>+</sup> 514.29116, Found 514.29180 (M + H)<sup>+</sup>.

**Physicochemical and spectral data for compound, 16:** Yield= 84%; <sup>1</sup>H NMR (400 MHz, CDCl<sub>3</sub>+DMSO-*d*<sub>6</sub>):  $\delta$  7.75-7.67 (m, 4H, Ar-H), 6.90-6.86 (m, 2H, Ar-H), 6.74-6.70 (m, 2H, Ar-H), 5.54 (t, *J* = 5.9 Hz, 1H, Sac-H), 4.81 (t, *J* = 4.5 Hz, 1H, Sac-H), 4.61-4.56 (m, 1H, Sac-H), 4.50-4.48 (m, 1H, Sac-H), 4.14-4.11 (m, 1H, Sac-H), 3.95-3.91 (m, 2H, Sac-H), 3.72-3.70 (m, 1H, Sac-H), 3.45-3.38 (m, 3H, Sac-H), 3.29-3.27 (m, 1H, Sac-H), 2.37 (d, 3H, Sac-H, -NH), 1.74-1.69 (m, 2H, Ali-H), 1.61- 1.58 (m, 2H, Ali-H), 1.38-1.20 (m, 10H, Ali-H, Sac-H), 0.86-0.78 (m, 6H, Sac-H, Ali-CH<sub>3</sub>); <sup>13</sup>C NMR (100 MHz, CDCl<sub>3</sub>+DMSO-*d*<sub>6</sub>):  $\delta$  160.8, 148.3, 146.9, 145.9, 124.4, 124.0, 114.6, 113.7, 102.4, 86.0, 80.2, 74.2, 74.0, 68.2, 67.4, 40.2, 40.0, 39.8, 36.2, 31.7, 29.3, 29.2, 26.0, 22.6, 17.4, 14.1, 13.9; HR-MS cald. for C<sub>30</sub>H<sub>43</sub>N<sub>3</sub>O<sub>6</sub> [M]<sup>+</sup> 542.32246, Found 542.32395 (M + H)<sup>+</sup>.



**Physicochemical and spectral data for compound, 17:** Yield= 88%;  $^1\text{H}$  NMR (400 MHz,  $\text{CDCl}_3+\text{DMSO}-d_6$ ):  $\delta$  7.80 (t,  $J = 15.3$  Hz, 4H, Ar-H), 6.95 (d,  $J = 8.9$  Hz, 2H, Ar-H), 6.82 (d,  $J = 8.6$  Hz, 2H, Ar-H), 4.79-4.64 (m, 3H, Sac-H), 4.18 (d,  $J = 6.0$  Hz, 1H, -NH), 3.99 (t,  $J = 6.4$  Hz, 2H, O-CH<sub>2</sub>), 3.84 (t,  $J = 8.8$  Hz, 1H, Ano-H), 3.72-3.67 (q,  $J = 7$  Hz, 4H, Sac-H), 3.54-3.46 (m, 2H, Sac-H), 3.34 (t,  $J = 8.7$  Hz, 1H, Sac-H), 2.82 (s, 1H, Sac-H), 2.69 (s, 1H, Sac-H), 2.15 (s, 1H, Sac-H), 1.80-1.76 (m, 2H, Ali-H), 1.57 (s, 7H, Ali-H), 1.44-1.20 (m, 10H, Ali-H), 0.85 (t,  $J = 6.74$  Hz, 3H, Ali-CH<sub>3</sub>);  $^{13}\text{C}$  NMR (100 MHz,  $\text{CDCl}_3+\text{DMSO}-d_6$ ):  $\delta$  160.3, 150.0, 146.4, 146.1, 124.3, 124.0, 123.7, 114.9, 113.2, 98.7, 84.7, 80.5, 73.9, 73.8, 67.9, 67.7, 66.6, 31.4, 29.1, 28.8, 28.7, 25.6, 22.2, 20.5, 14.1; HR-MS calcd. for  $\text{C}_{30}\text{H}_{43}\text{N}_3\text{O}_6$   $[\text{M}]^+$  570.35376, Found 570.35388 (M + H)<sup>+</sup>.

**Physicochemical and spectral data for compound, 18:** Yield= 87%;  $^1\text{H}$  NMR (400 MHz,  $\text{CDCl}_3+\text{DMSO}-d_6$ ):  $\delta$  7.85-7.80 (m, 4H, Ar-H), 6.97 (d,  $J = 9.0$  Hz, 2H, Ar-H), 6.84 (d,  $J = 8.8$  Hz, 2H, Ar-H), 4.79 (t,  $J = 8.5$  Hz, 1H, Sac-H), 4.70 (d,  $J = 8.6$  Hz, 1H, Sac-H), 4.57 (t,  $J = 5.1$  Hz, 1H, Sac-H), 4.22-4.19 (dd,  $J = 3.2$  Hz,  $J = 3.7$  Hz, 1H, Sac-H), 4.01 (t,  $J = 6.6$  Hz, 2H, Sac-H), 3.88-3.83 (m, 1H, Sac-H), 3.73-3.70 (m, 1H, Sac-H), 3.56-3.46 (m, 3H, Sac-H), 3.34 (t,  $J = 9.1$  Hz, 1H, Sac-H), 2.84 (s, 1H, Sac-H), 2.75 (s, 1H, Sac-H), 2.17 (s, 1H, -NH), 1.84-1.77 (quint,  $J = 7.0$  Hz, 2H, Ali-CH<sub>2</sub>), 1.67-1.60 (m, 6H, Ali-H), 1.48-1.22 (m, 14H, Ali-H & Sac-H), 0.93 (t,  $J = 7.3$  Hz, 3H, Sac-H), 0.87 (t,  $J = 6.6$  Hz, 3H, Ali-CH<sub>3</sub>);  $^{13}\text{C}$  NMR (100 MHz,  $\text{CDCl}_3+\text{DMSO}-d_6$ ):  $\delta$  160.4, 150.0, 146.5, 144.2, 124.3, 114.9, 113.2, 101.5, 84.9, 80.6, 74.0, 73.9, 68.0, 67.9, 67.0, 36.2, 31.5, 29.3, 29.2, 29.0, 28.9, 28.8, 25.7, 22.3, 18.7, 17.3, 14.1, 14.0; HR-MS calcd. for  $\text{C}_{34}\text{H}_{51}\text{N}_3\text{O}_6$   $[\text{M}]^+$  598.38506, Found 598.38559 (M + H)<sup>+</sup>.

**Physicochemical and spectral data for compound, 19:** Yield= 84%;  $^1\text{H}$  NMR (400 MHz,  $\text{CDCl}_3+\text{DMSO}-d_6$ ):  $\delta$  7.82 (t,  $J = 10.2$  Hz, 4H, Ar-H), 6.96 (d,  $J = 8.9$  Hz, 2H, Ar-H), 6.83 (d,  $J = 8.8$  Hz, 2H, Ar-H), 4.78-4.74 (m, 3H, Sac-H), 4.21 (d,  $J = 5.7$  Hz, 1H, -NH), 4.01 (t,  $J = 6.6$  Hz, 2H, O-CH<sub>2</sub>), 3.86 (t,  $J = 9.4$  Hz, 1H, Ano-H), 3.74-3.69 (q,  $J = 6.8$  Hz, 3H, Sac-H), 3.56-3.47 (m, 3H, Sac-H), 3.36 (t,  $J = 8.9$  Hz, 1H, Sac-H), 2.90 (d,  $J = 8.0$  Hz, 2H, Sac-H), 2.21-2.11 (m, 2H, Sac-H), 2.00 (s, 1H, Sac-H), 1.82-1.78 (m, 2H, Ali-H), 1.63 (s, 7H, Ali-H), 1.39-1.22 (m, 16H, Ali-H), 0.87 (t,  $J = 6.8$  Hz, 3H, Ali-CH<sub>3</sub>);  $^{13}\text{C}$  NMR (100 MHz,  $\text{CDCl}_3+\text{DMSO}-d_6$ ):  $\delta$  161.4, 146.8, 124.4, 124.2, 114.6,

114.5, 99.7, 80.0, 74.4, 68.2, 67.6, 58.5, 31.9, 30.9, 29.7, 29.6, 29.6, 29.3, 26.2, 26.0, 22.7, 20.30, 18.4, 14.1; HR-MS cald. for C<sub>36</sub>H<sub>55</sub>N<sub>3</sub>O<sub>6</sub> [M]<sup>+</sup> 626.41632, Found 626.41632 (M + H)<sup>+</sup>.

**Physicochemical and spectral data for compound, 20:** Yield= 82%; <sup>1</sup>H NMR (400 MHz, CDCl<sub>3</sub>+DMSO-*d*<sub>6</sub>): δ 7.84-7.79 (m, 4H, Ar-H), 6.97 (d, *J* = 9.0 Hz, 2H, Ar-H), 6.84 (d, *J* = 8.8 Hz, 2H, Ar-H), 4.78 (t, *J* = 8.3 Hz, 1H, Sac-H), 4.70 (d, *J* = 8.5 Hz, 1H, Sac-H), 4.57 (t, *J* = 5.04 Hz, 1H, Sac-H), 4.22-4.19 (dd, *J* = 3.4Hz, *J* = 3.72 Hz, 1H, Sac-H), 4.01 (t, *J* = 6.6 Hz, 2H, Sac-H), 3.85 (t, *J* = 8.8 Hz, 1H, Sac-H), 3.56-3.45 (m, 3H, Sac-H), 3.34 (t, *J* = 8.9 Hz, 1H, Sac-H), 2.87 (s, 1H, Sac-H), 2.79 (s, 1H, Sac-H), 2.17 (s, 1H, -NH), 1.84-1.77 (quint, *J* = 7.0 Hz, 2H, Ali-CH<sub>2</sub>), 1.66 - 1.60 (m, 5H, Ali-H), 1.48 - 1.25 (m, 24H, Ali-H, Sac-H), 0.93 (t, *J* = 7.4 Hz, 3H, Sac-H), 0.87 (t, *J* = 6.8 Hz, 3H, Ali-CH<sub>3</sub>); <sup>13</sup>C NMR (100 MHz, CDCl<sub>3</sub>+DMSO- *d*<sub>6</sub>): δ 161.3, 147.5, 147.2, 147.0, 124.7, 124.5, 114.9, 114.8, 102.8, 85.6, 80.3, 74.7, 74.5, 68.6, 67.9, 36.5, 32.2, 30.0, 29.9, 29.8, 29.7, 29.6, 29.5, 26.3, 22.9, 17.7, 14.4, 14.2; HR-MS cald. for C<sub>38</sub>H<sub>59</sub>N<sub>3</sub>O<sub>6</sub> [M]<sup>+</sup> 654.44766, Found 654.44803 (M + H)<sup>+</sup>.

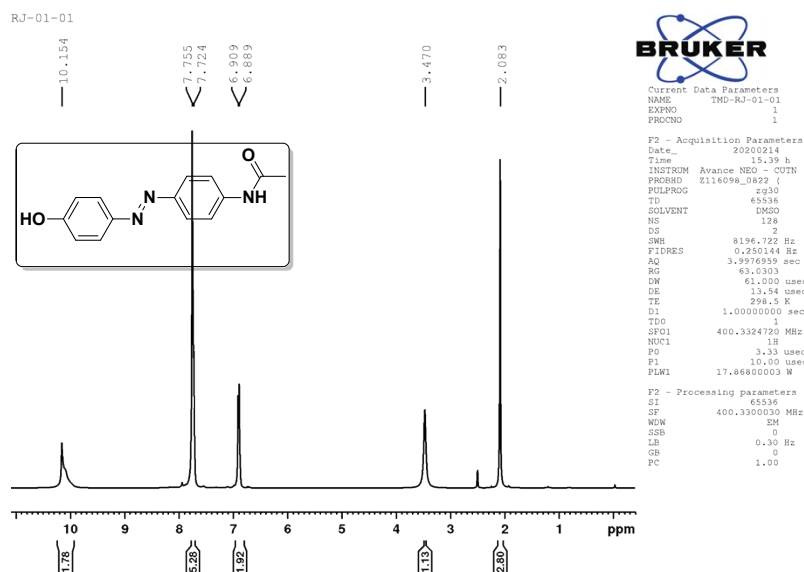

Fig. S12 <sup>1</sup>H NMR Spectrum of compound, 5 (CDCl<sub>3</sub>+DMSO- *d*<sub>6</sub>, 400 MHz)

RJ-01-01

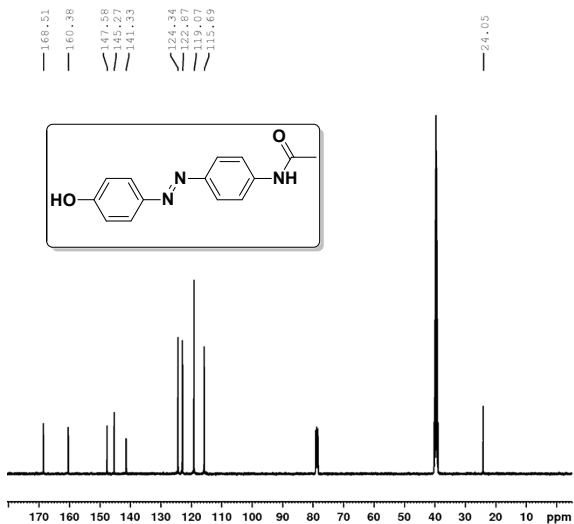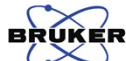

Current Data Parameters  
NAME TMD-RJ-01-01  
EXPNO 2  
PROCNO 1

F2 - Acquisition Parameters  
Date\_ 20200214  
Time 16:39 h  
INSTRUM Avance NEO - CUTN  
PROBHD 5116098\_0822 (1  
PULPROG zgpg30  
TD 65536  
SOLVENT DMSO  
NS 1024  
DS 4  
SWH 23804.523 Hz  
FIDRES 0.728609 Hz  
AQ 1.3762860 sec  
RG 51.9437  
DM 21.000 usec  
DE 6.50 usec  
TE 299.1 K  
D1 2.0000000 sec  
D11 0.0300000 sec  
TD0 1  
SFO1 100.6731253 MHz  
NUC1 13C  
P1 3.33 usec  
F1 10.00 usec  
PLN1 74.77500153 W  
SFO2 400.3316013 MHz  
NUC2 1H  
PCPRG12 waltz165  
PCP2 50.00 usec  
PLN2 17.86800003 W  
PLN12 0.22059000 W  
PLN13 0.11096000 W  
F2 - Processing parameters  
SI 32768  
SF 100.6631078 MHz  
WDW EM  
SSB 0  
LB 1.00 Hz  
GB 0  
PC 1.40

Fig. S13  $^{13}\text{C}$  NMR Spectrum of compound, 5 ( $\text{CDCl}_3 + \text{DMSO}-d_6$ , 100 MHz)

RJ-01 #3-203 RT: 0.03-1.97 AV: 101 NL: 1.14E8

T: FTMS + p ESI Full ms [100.0000-1500.0000]

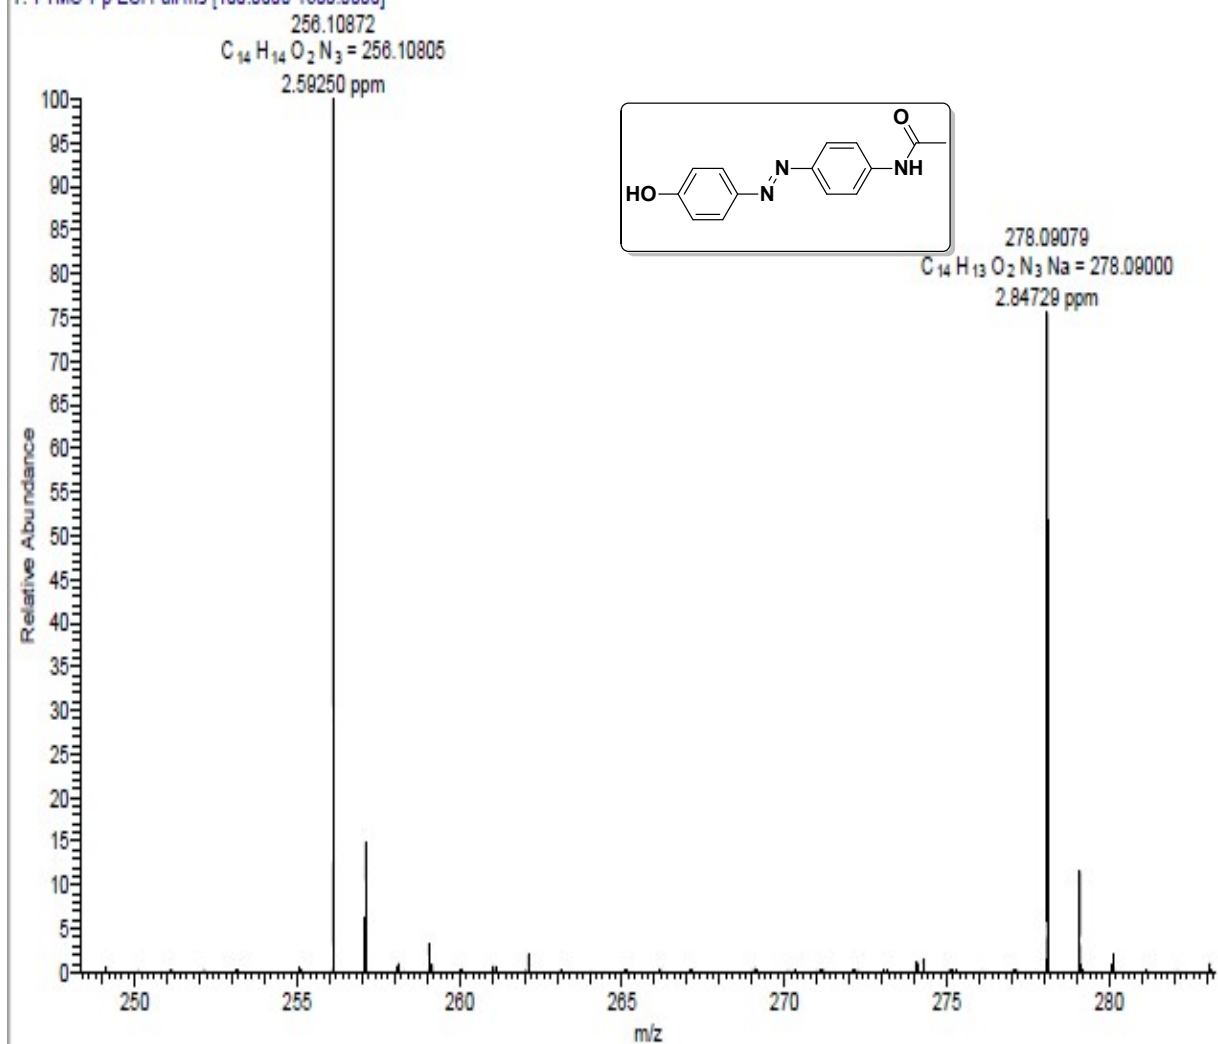

Fig. S14 HR-MS Spectrum of compound, 5

RJ-01-02

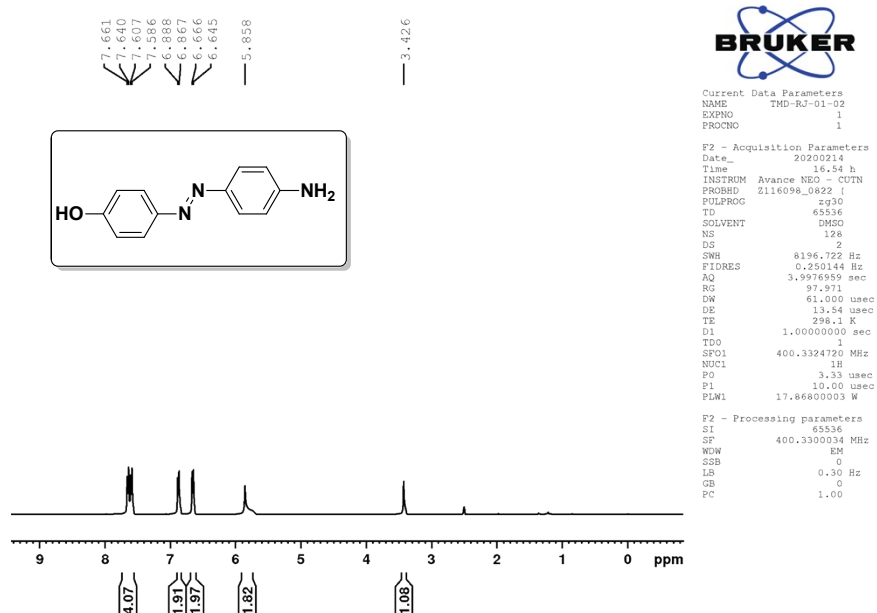Fig. S15 <sup>1</sup>H NMR Spectrum of compound, 6 (CDCl<sub>3</sub>+DMSO- *d*<sub>6</sub>, 400 MHz)

RJ-01-02

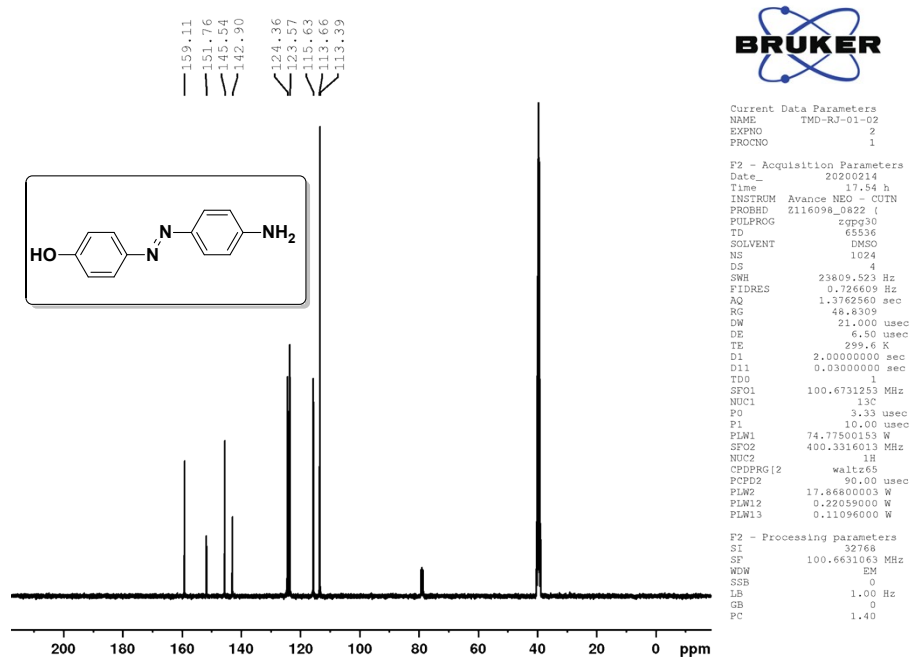Fig. S16 <sup>13</sup>C NMR Spectrum of compound, 6 (CDCl<sub>3</sub>+DMSO- *d*<sub>6</sub>, 100 MHz)

RJ-02 #5-205 RT: 0.05-1.99 AV: 101 NL: 3.27E8  
T: FTMS + p ESI Full ms [100.0000-1500.0000]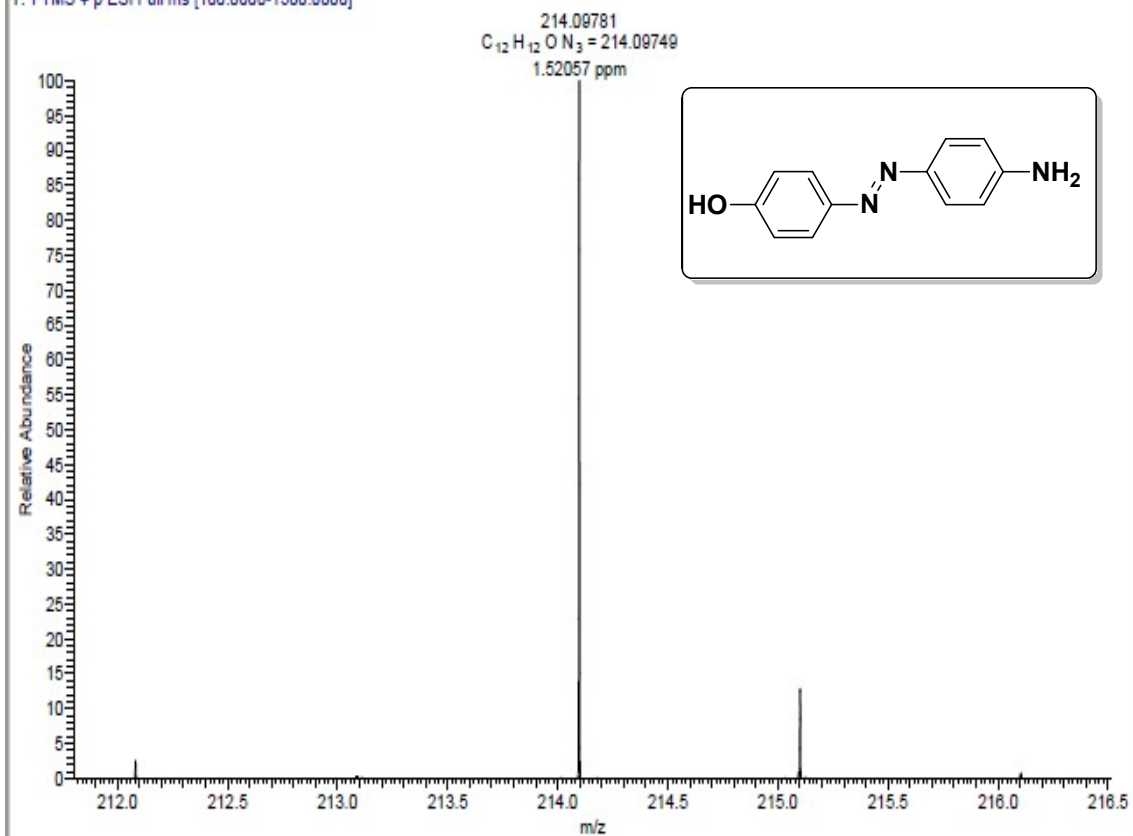

Fig. S17 HR-MS Spectrum of compound, 6

RJ-01-03A

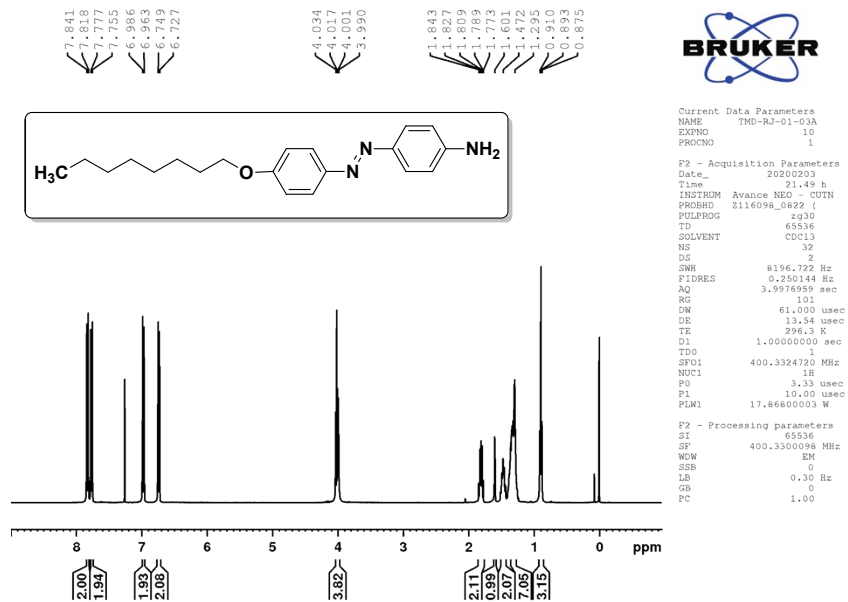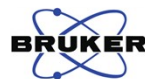

Current Data Parameters  
 NAME TMD-RJ-01-03A  
 EXPNO 10  
 PROCNO 1

F2 - Acquisition Parameters  
 Date\_ 20200203  
 Time 21.49 h  
 INSTRUM Avance NEO - CUI  
 PROBHD 2116098\_0822 (zgg30)  
 PULPROG zgpg30  
 TD 65536  
 SOLVENT CDCl3  
 NS 32  
 DS 2  
 SWH 8196.722 Hz  
 FIDRES 0.250144 Hz  
 AQ 3.9976959 sec  
 RG 101  
 DW 61.000 usec  
 DE 13.54 usec  
 TE 296.2 K  
 D1 1.00000000 sec  
 TDO 1  
 SFO1 400.324720 MHz  
 NUC1 1H  
 PO 3.33 usec  
 P1 10.00 usec  
 PLW1 17.86600003 W

F2 - Processing parameters  
 SI 65536  
 SP 400.330098 MHz  
 WDW EM  
 SSB 0  
 LB 0.30 Hz  
 GB 0  
 PC 1.00

Fig. S18 <sup>1</sup>H NMR Spectrum of compound, 10 (CDCl<sub>3</sub>, 400 MHz)

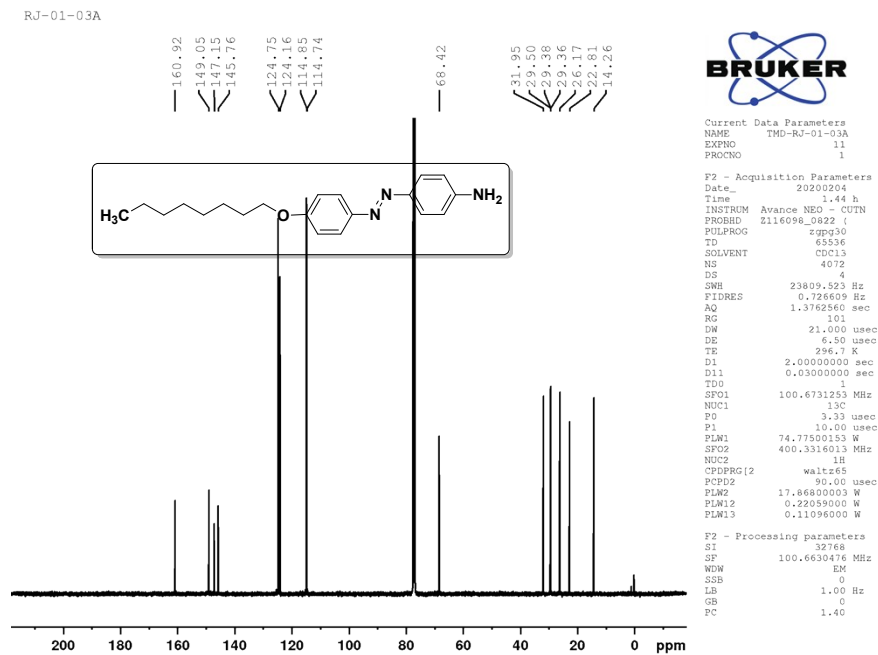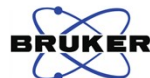

Current Data Parameters  
 NAME TMD-RJ-01-03A  
 EXPNO 11  
 PROCNO 1

F2 - Acquisition Parameters  
 Date\_ 20200204  
 Time 1.44 h  
 INSTRUM Avance NEO - CUI  
 PROBHD 2116098\_0822 (zgg30)  
 PULPROG zgpg30  
 TD 65536  
 SOLVENT CDCl3  
 NS 4072  
 DS 4  
 SWH 23809.523 Hz  
 FIDRES 0.726609 Hz  
 AQ 1.3762560 sec  
 RG 101  
 DW 21.000 usec  
 DE 6.50 usec  
 TE 296.2 K  
 D1 2.00000000 sec  
 D11 0.03000000 sec  
 TDO 1  
 SFO1 100.6731253 MHz  
 NUC1 13C  
 PO 3.33 usec  
 P1 10.00 usec  
 PLW1 74.77500153 W  
 SFO2 400.3316013 MHz  
 NUC2 1H  
 CPDPRG2 waltz65  
 PCPDZ 90.00 usec  
 PLW2 17.86600003 W  
 PLW12 0.22059000 W  
 PLW13 0.11096000 W

F2 - Processing parameters  
 SI 32768  
 SP 100.6630476 MHz  
 WDW EM  
 SSB 0  
 LB 1.00 Hz  
 GB 0  
 PC 1.40

Fig. S19 <sup>13</sup>C NMR Spectrum of compound, 10 (CDCl<sub>3</sub>, 100 MHz)

TMD-RJ-01-03B

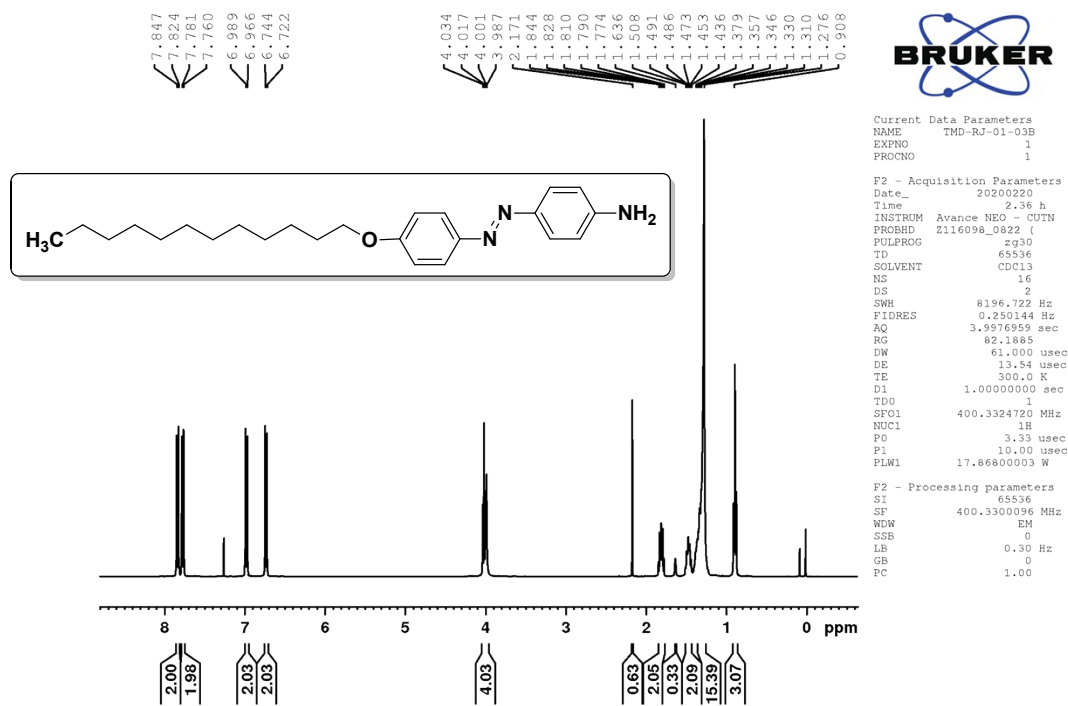

Fig. S20 <sup>1</sup>H NMR Spectrum of compound, 11 (CDCl<sub>3</sub>, 400 MHz)

TMD-RJ-01-03B

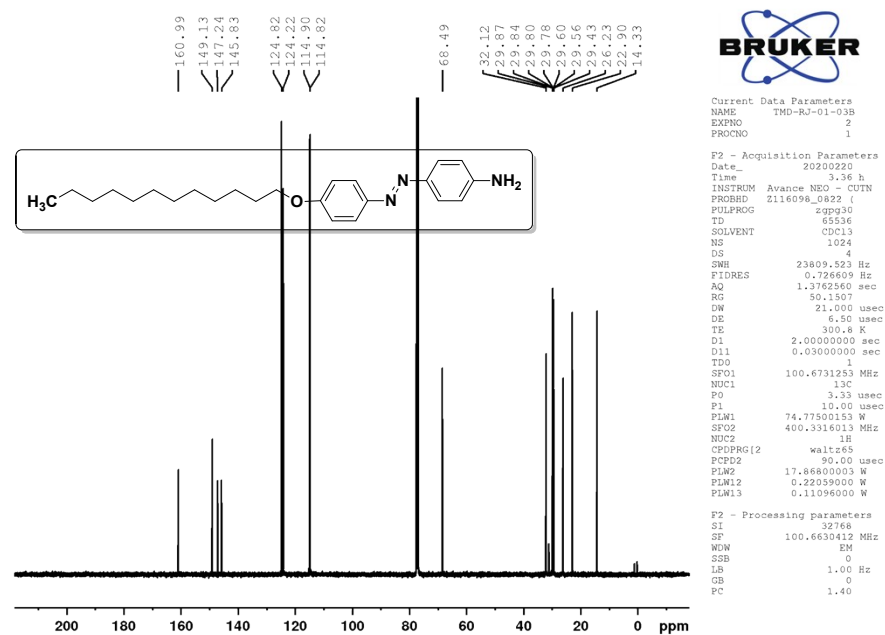

Fig. S21 <sup>13</sup>C NMR Spectrum of compound, 11 (CDCl<sub>3</sub>, 100 MHz)



RJ-03B #4-201 RT: 0.05-1.98 AV: 99 NL: 5.05E7  
T: FTMS + p ESI Full ms [100.0000-1500.0000]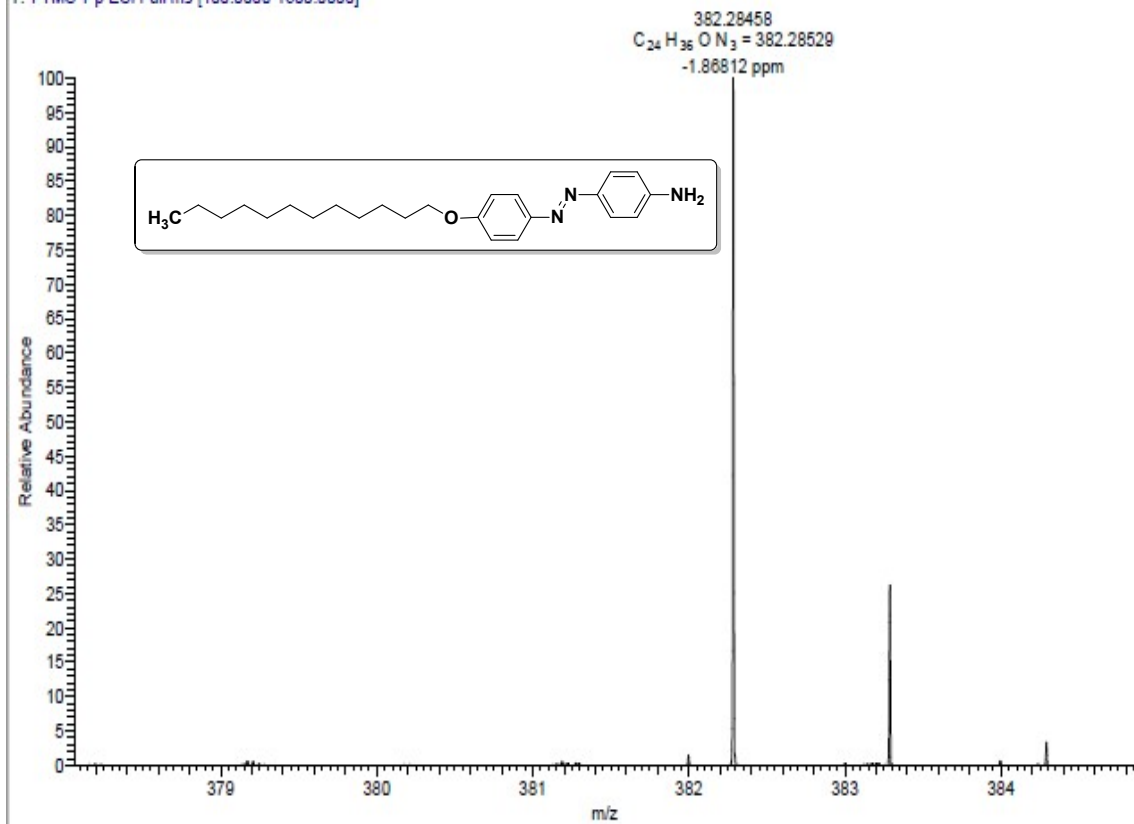

Fig. S22 HR-MS Spectrum of compound, 11

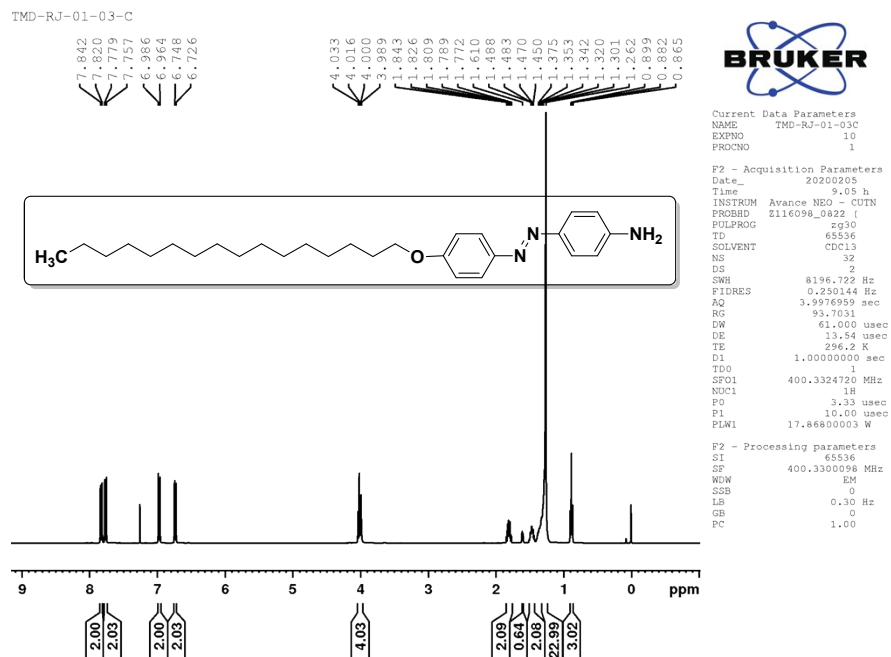

Fig. S23  $^1\text{H}$  NMR Spectrum of compound, 12 ( $\text{CDCl}_3$ , 400 MHz)

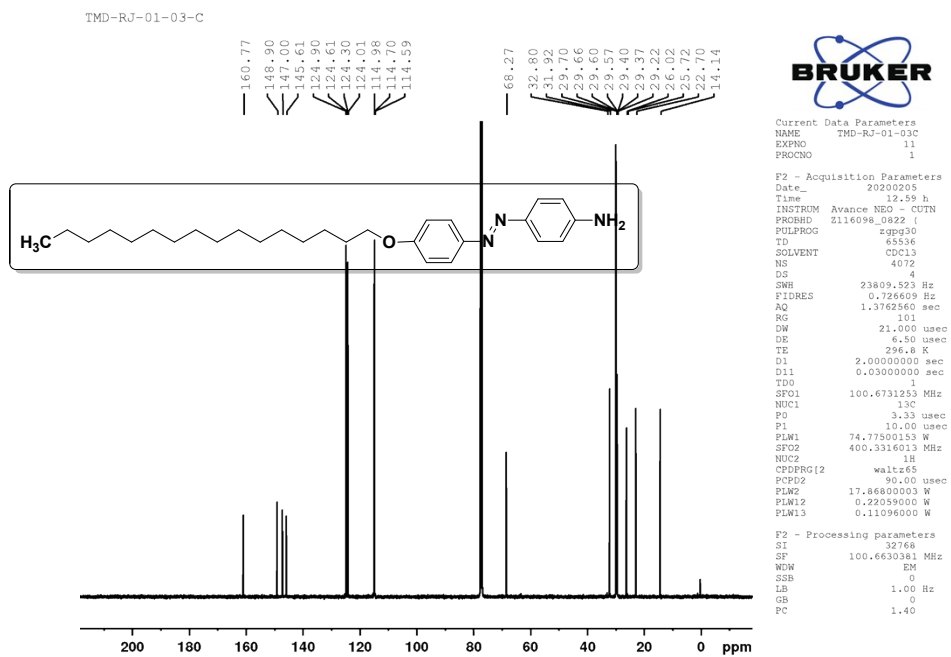

Fig. S24  $^{13}\text{C}$  NMR Spectrum of compound, 12 ( $\text{CDCl}_3$ , 100 MHz)

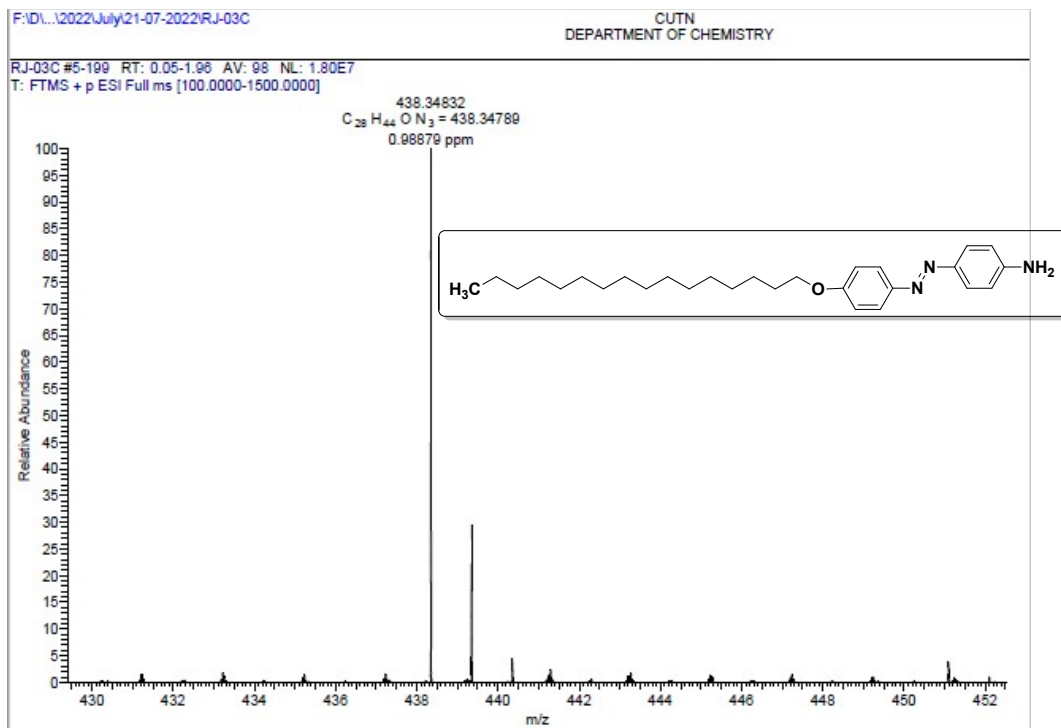

Fig. S25 HR-MS Spectrum of compound, 12

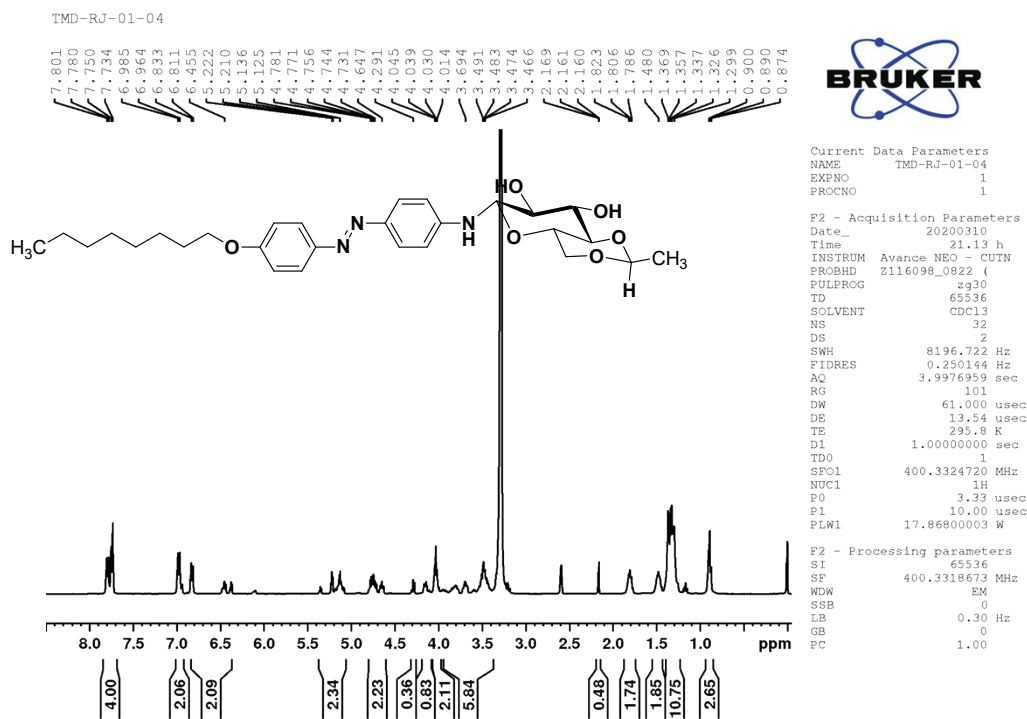

Fig. S26  $^1\text{H}$  NMR Spectrum of compound, 15 ( $\text{CDCl}_3 + \text{DMSO}-d_6$ , 400 MHz)

TMD-RJ-01-04

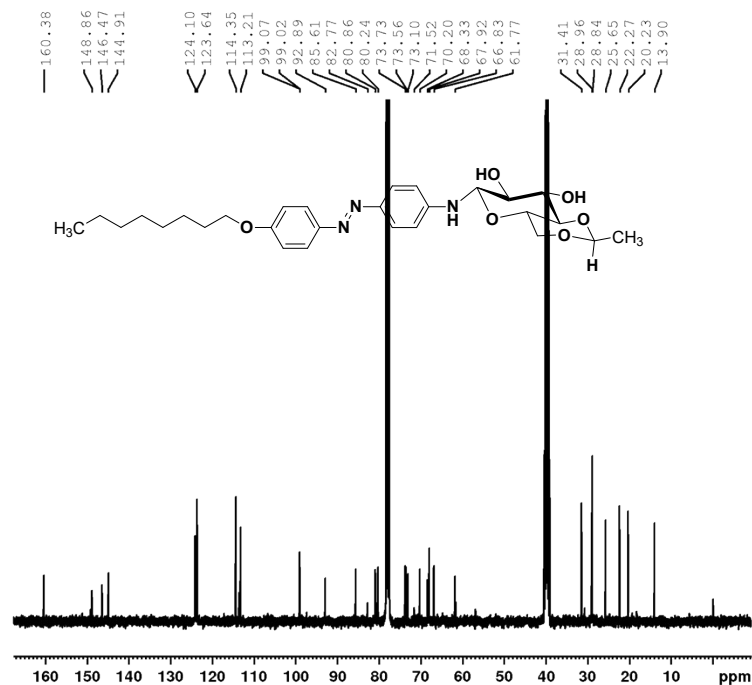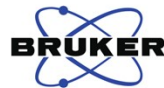

Fig. S27 <sup>13</sup>C NMR Spectrum of compound, 15 (CDCl<sub>3</sub>+DMSO-*d*<sub>6</sub>, 100 MHz)

TMD-RJ-01-04

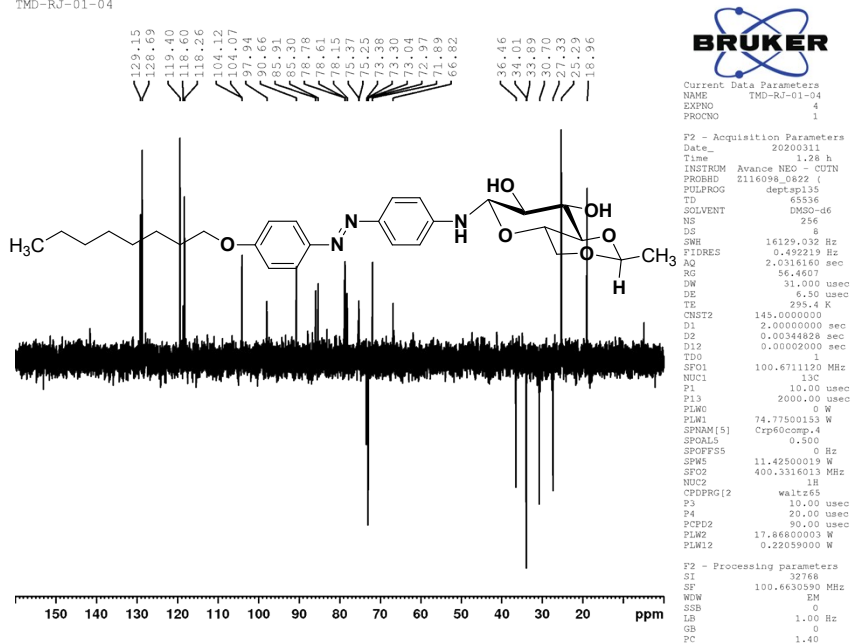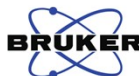

Fig. S28 DEPT-135 Spectrum of compound, 15

4 #11-199 RT: 0.10-1.96 AV: 95 NL: 3.88E6  
T: FTMS + p ESI Full lock ms [150.0000-1500.0000]

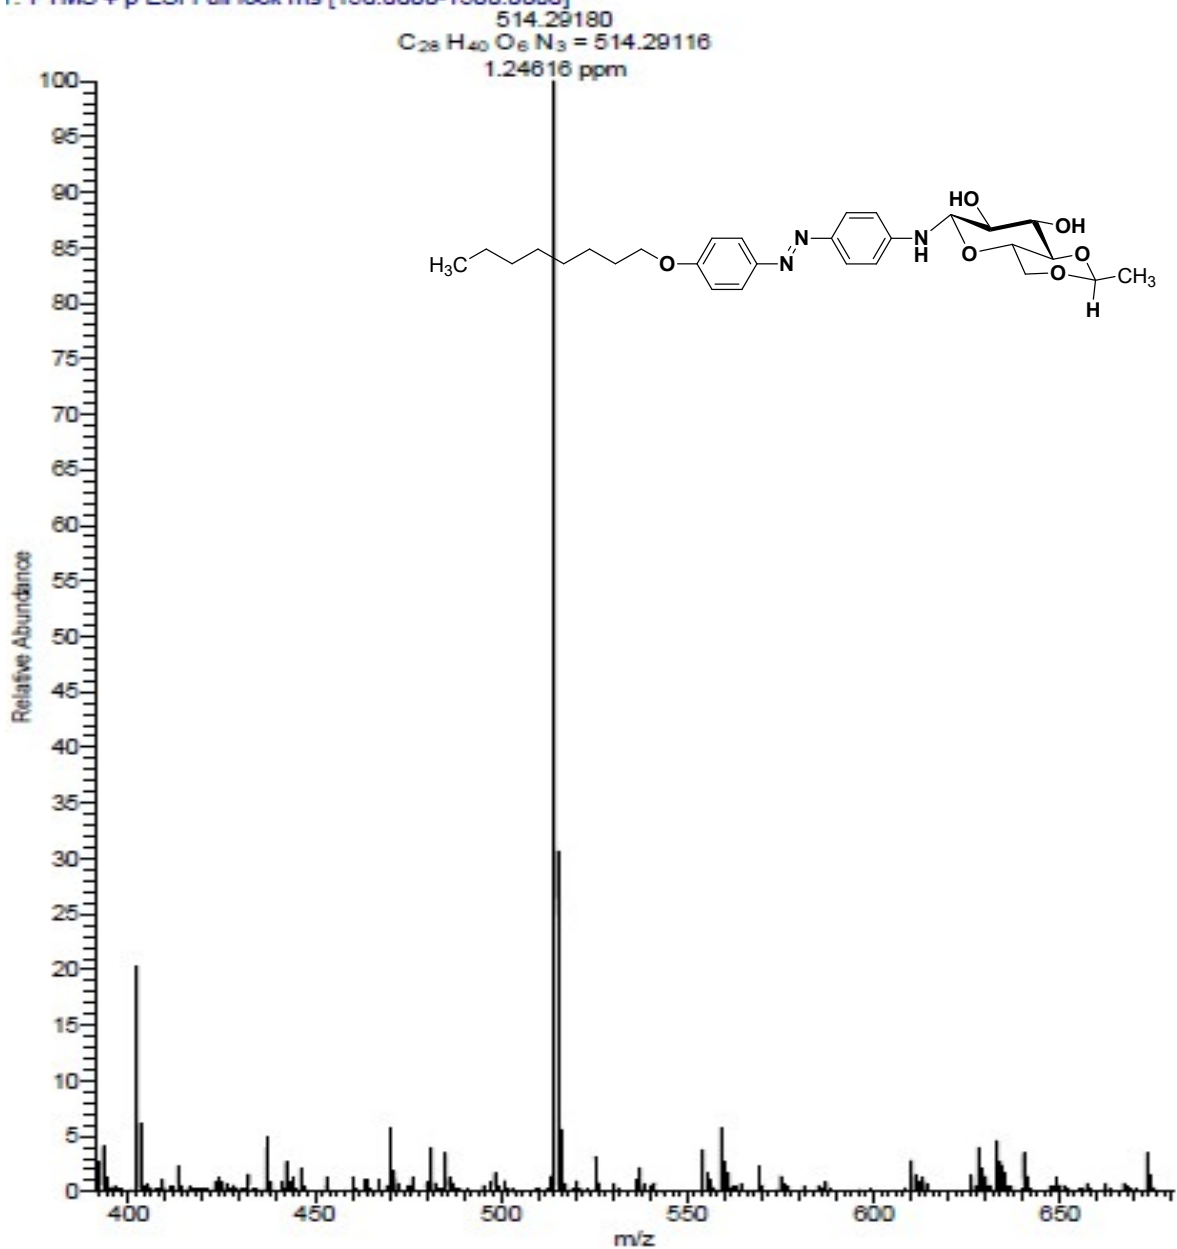

Fig. S29 HR-MS Spectrum of compound, 15

TMD-RJ-01-05

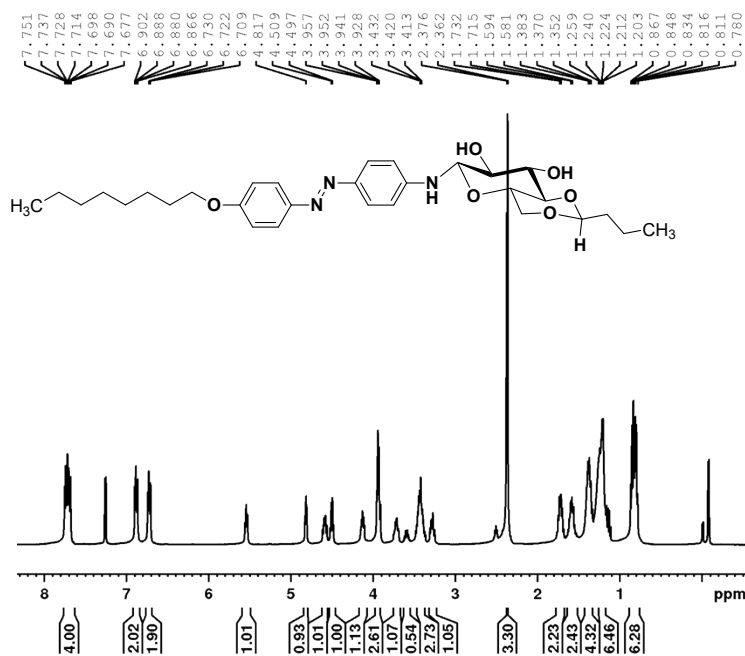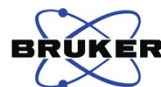

Current Data Parameters  
 NAME TMD-RJ-01-05  
 EXPNO 1  
 PROCNO 1

F2 - Acquisition Parameters  
 Date\_ 20200227  
 Time 16:40 h  
 INSTRUM Avance NEO - CUTN  
 PROBHD Z116098\_0822 ( )  
 PULPROG zgpg30  
 TD 65536  
 SOLVENT CDCl3  
 NS 32  
 DS 2  
 SWH 8196.722 Hz  
 FIDRES 0.250144 Hz  
 AQ 3.9976959 sec  
 RG 101  
 DW 61.000 usec  
 DE 13.54 usec  
 TE 297.4 K  
 D1 1.0000000 sec  
 TDO 1  
 SFO1 400.3324720 MHz  
 NUC1 1H  
 P0 3.33 usec  
 P1 10.00 usec  
 PLW1 17.86800003 W

F2 - Processing parameters  
 SI 65536  
 SF 400.3300143 MHz  
 WDW EM  
 SSB 0  
 LB 0.30 Hz  
 GB 0  
 PC 1.00

Fig. S30 <sup>1</sup>H NMR Spectrum of compound, 16 (CDCl<sub>3</sub>+DMSO-*d*<sub>6</sub>, 400 MHz)

TMD-RJ-01-05

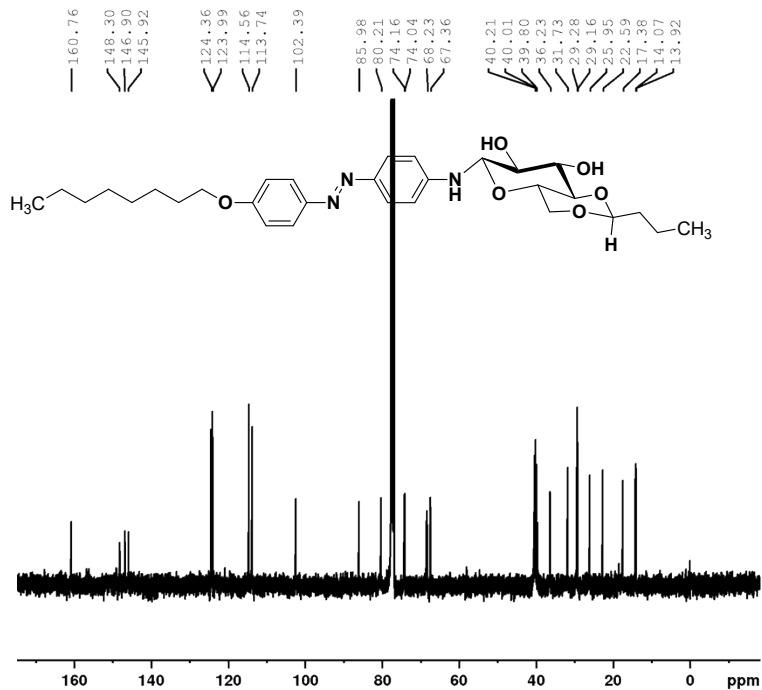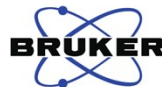

Current Data Parameters  
 NAME TMD-RJ-01-05  
 EXPNO 2  
 PROCNO 1

F2 - Acquisition Parameters  
 Date\_ 20200227  
 Time 17:41 h  
 INSTRUM Avance NEO - CUTN  
 PROBHD Z116098\_0822 ( )  
 PULPROG zgpg30  
 TD 65536  
 SOLVENT CDCl3  
 NS 1024  
 DS 4  
 SWH 23809.523 Hz  
 FIDRES 0.726609 Hz  
 AQ 1.3762560 sec  
 RG 47.678  
 DW 21.000 usec  
 DE 6.50 usec  
 TE 298.1 K  
 D1 2.0000000 sec  
 D11 0.0300000 sec  
 TDO 1  
 SFO1 100.6731253 MHz  
 NUC1 13C  
 P0 3.33 usec  
 P1 10.00 usec  
 PLW1 74.77500153 W  
 SFO2 400.3316013 MHz  
 NUC2 1H  
 CPDPRG2 waltz65  
 PCPD2 90.00 usec  
 PLW2 17.86800003 W  
 PLW12 0.22039000 W  
 PLW13 0.11096000 W

F2 - Processing parameters  
 SI 32768  
 SF 100.6630608 MHz  
 WDW EM  
 SSB 0  
 LB 1.00 Hz  
 GB 0  
 PC 1.40

Fig. S31 <sup>13</sup>C NMR Spectrum of compound, 16 (CDCl<sub>3</sub>+DMSO-*d*<sub>6</sub>, 100 MHz)

TMD-RJ-01-05

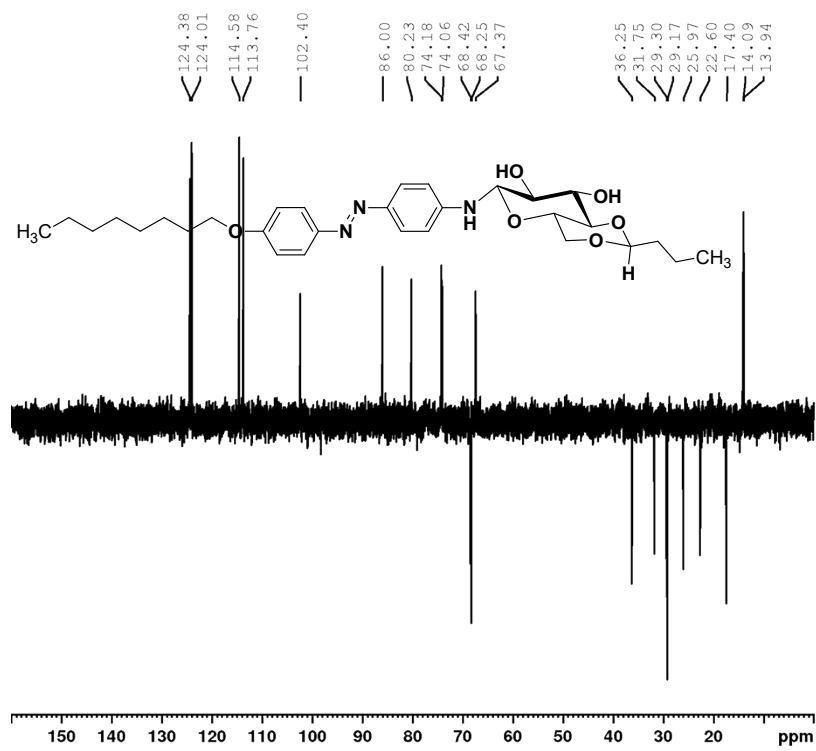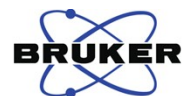

Current Data Parameters  
NAME TMD-RJ-01-05  
EXPNO 3  
PROCNO 1

F2 - Acquisition Parameters  
Date\_ 20200227  
Time 18.00 h  
INSTRUM Avance NEO - CUTN  
PROBHD Z116098\_0822 ( )  
PULPROG deptsp135  
TD 65536  
SOLVENT CDCl3  
NS 256  
DS 8  
SWH 16129.032 Hz  
FIDRES 0.492219 Hz  
AQ 2.0316160 sec  
RG 101  
DW 31.000 usec  
DE 6.50 usec  
TE 297.8 K  
CNST2 145.0000000  
D1 2.00000000 sec  
D2 0.00344828 sec  
D12 0.00002000 sec  
TD0 1  
SFO1 100.6711120 MHz  
NUC1 13C  
P1 10.00 usec  
P13 2000.00 usec  
PLW0 0 W  
PLW1 74.77500153 W  
SPNAM[5] Crp60comp.4  
SFOALS 0.500  
SPOFFS5 0 Hz  
SPW5 11.42500019 W  
SFO2 400.3316013 MHz  
NUC2 1H  
CPDPRG[2] waltz65  
P3 10.00 usec  
P4 20.00 usec  
PCPD2 90.00 usec  
PLW2 17.86800003 W  
PLW12 0.22059000 W

F2 - Processing parameters  
SI 32768  
SF 100.6630590 MHz  
WDW EM  
SSB 0  
LB 1.00 Hz  
GB 0  
PC 1.40

Fig. S32 DEPT-135 Spectrum of compound, 16

05 #146-167 RT: 1.45-1.65 AV: 11 NL: 2.03E5  
T: FTMS + p ESI Full ms [150.0000-1500.0000]

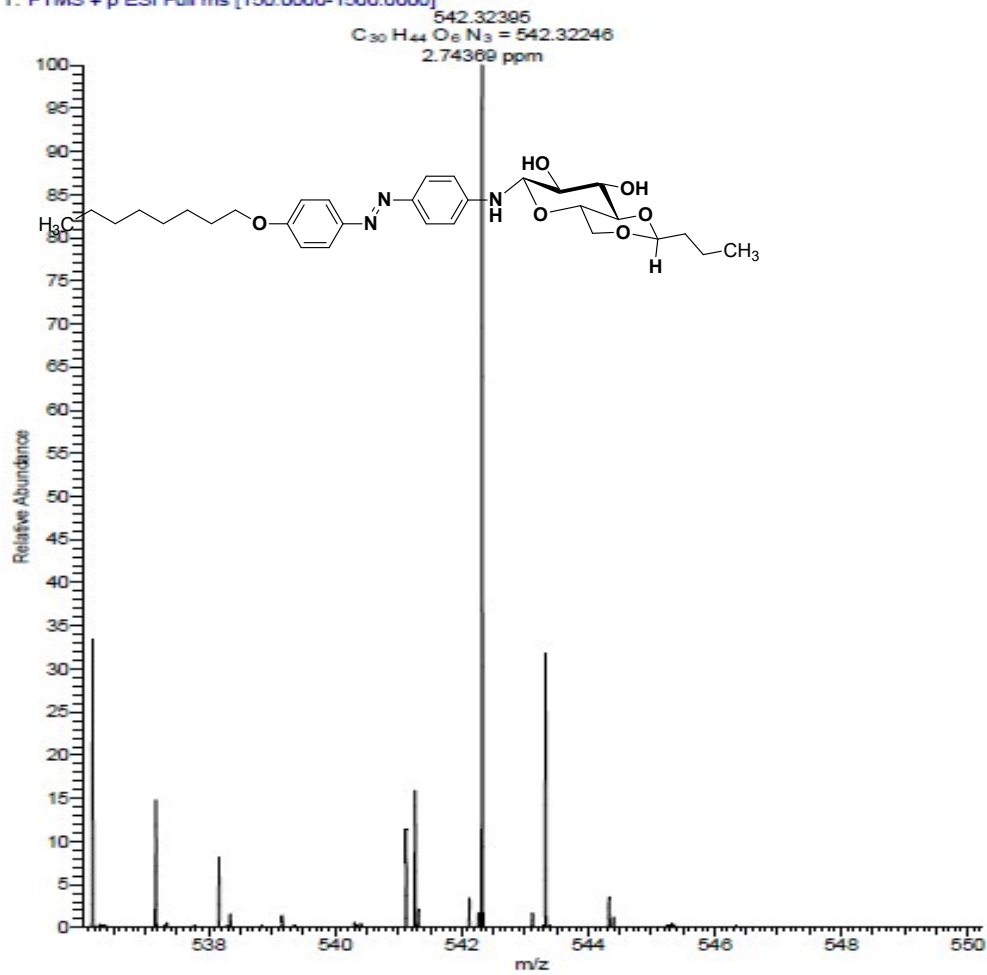

Fig. S33 HR-MS Spectrum of compound, 16



TMD-RJ-01-06

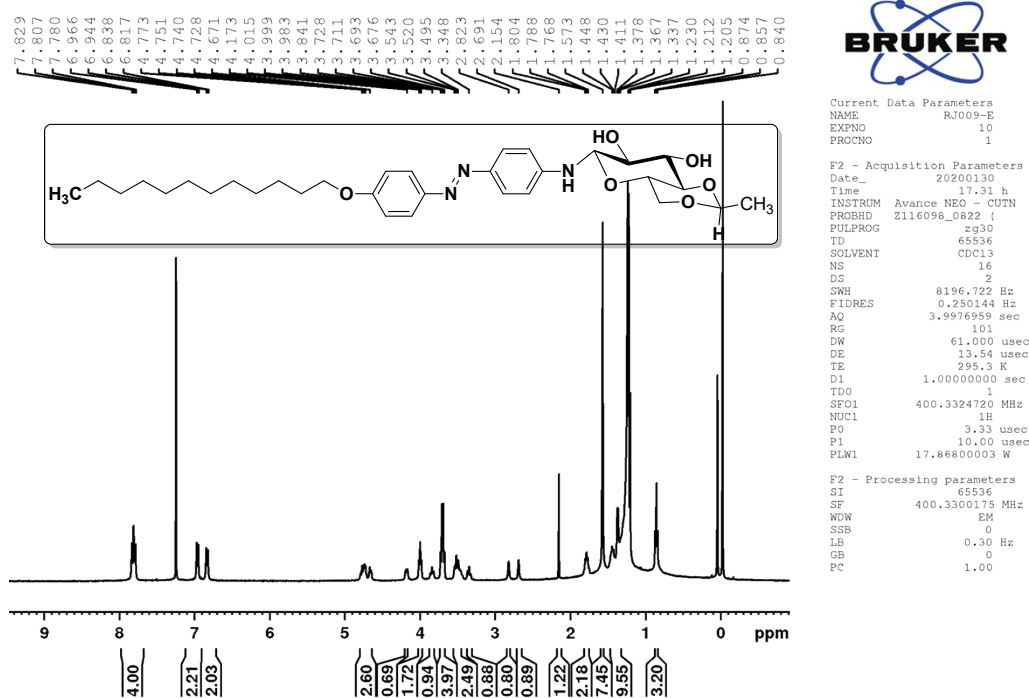

Fig. S34 <sup>1</sup>H NMR Spectrum of compound, 17 (CDCl<sub>3</sub>+DMSO- d<sub>6</sub>, 400 MHz)

TMD-RJ-01-06

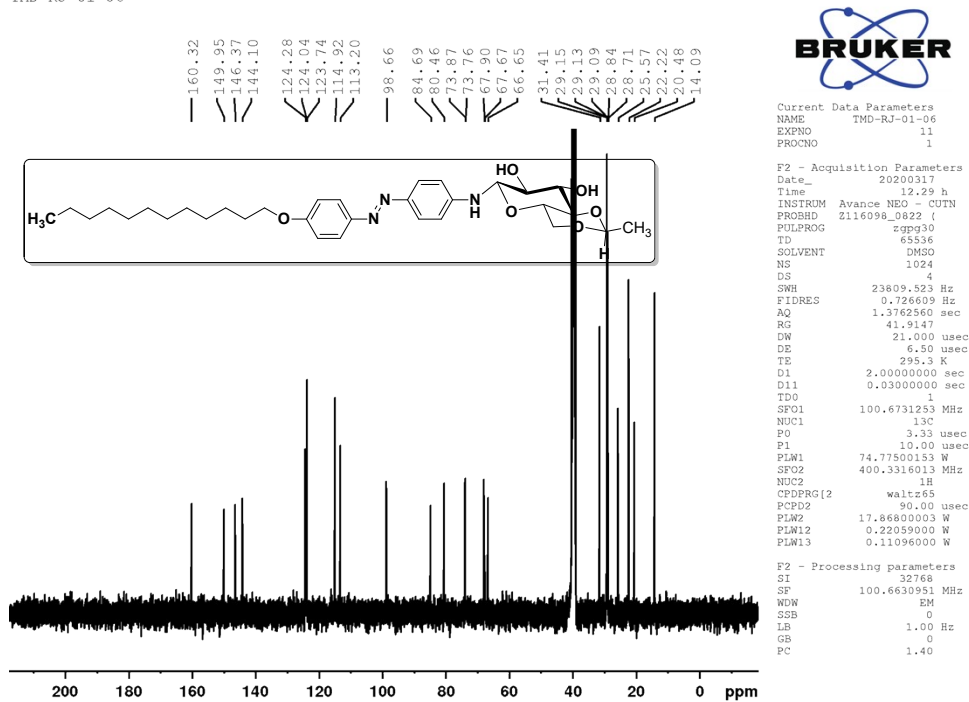

Fig. S35 <sup>13</sup>C NMR Spectrum of compound, 17 (CDCl<sub>3</sub>+DMSO- d<sub>6</sub>, 100 MHz)

TMD-RJ-01-06

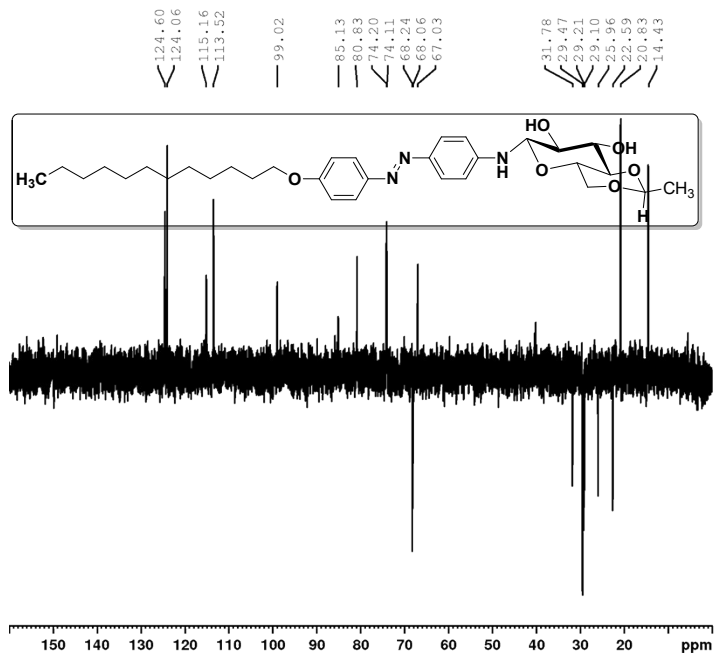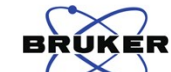

Current Date: 11/11/2020  
NAME: TMD-RJ-01-06  
EXNO: 7  
PROCNO: 1

F2 - Acquisition Parameters  
Date\_: 20200226  
Time: 4.34 h  
INSTRUM: Avance NEO - CUTN  
PROBHD: Z116098.0822 (1  
PULPROG: deptsp135  
TD: 65536  
SOLVENT: DMSO  
NS: 756  
DS: 8  
SWH: 16129.032 Hz  
FIDRES: 0.492219 Hz  
AQ: 2.0316160 sec  
RG: 101  
DW: 31.000 usec  
DE: 6.50 usec  
TE: 295.6 K  
CNST2: 145.0000000  
D1: 2.00000000 sec  
D2: 0.00344828 sec  
D12: 0.00002000 sec  
TD0: 1  
SFO1: 100.6711120 MHz  
NUC1: 13C  
P1: 10.00 usec  
P13: 2000.00 usec  
PLW0: 0 W  
PLW1: 74.77500153 W  
SPNAM[5]: Crp60comp.4  
SFOALS: 0.500  
SPOFFS5: 0 Hz  
SPW5: 11.42500019 W  
SFO2: 400.3316013 MHz  
NUC2: 1H  
CPDPRG[2]: waltz65  
P3: 10.00 usec  
P4: 20.00 usec  
PCPD2: 90.00 usec  
PLW2: 17.86600003 W  
PLW12: 0.22059000 W

F2 - Processing parameters  
SI: 32768  
SF: 100.6630590 MHz  
WDW: EM  
---

Fig. S36 DEPT-135 Spectrum of compound, 17

06 #9-204 RT: 0.08-2.00 AV: 98 NL: 1.11E6  
T: FTMS + p ESI Full ms [150.0000-1500.0000]

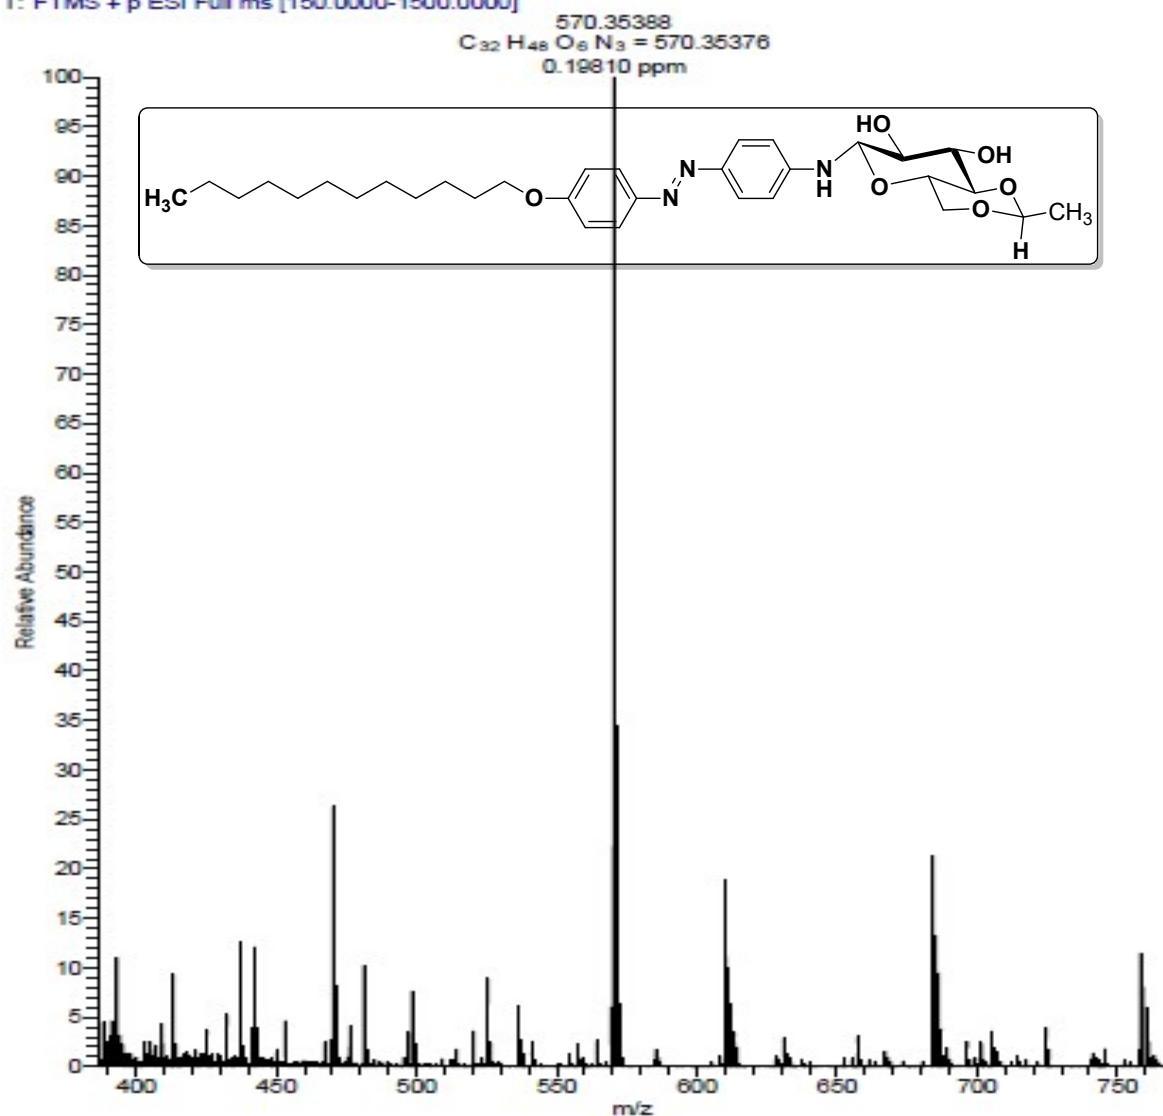

Fig. S37 HR-MS Spectrum of compound, 17

TMD-RJ-01-07

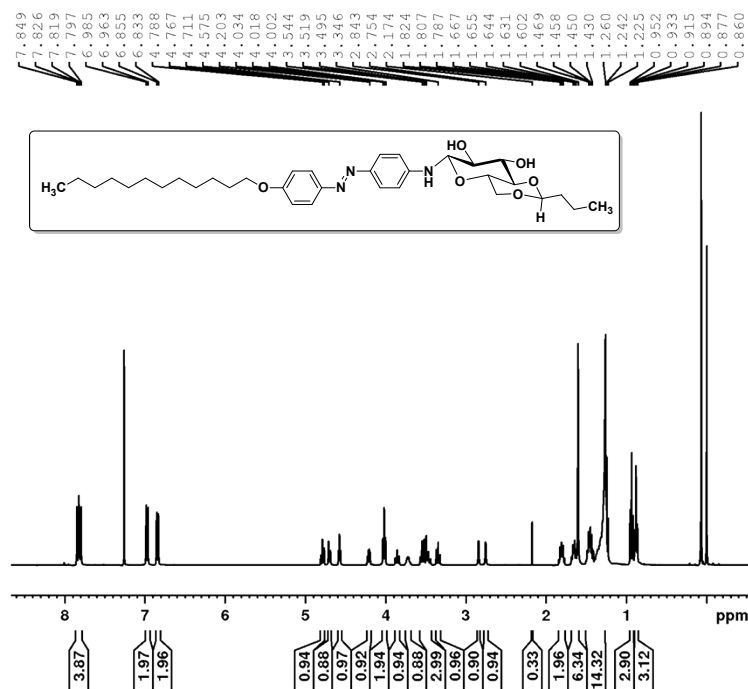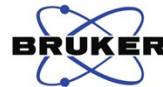

Current Data Parameters  
 NAME RJ009-B  
 EXPNO 10  
 PROCNO 1

F2 - Acquisition Parameters  
 Date\_ 20200130  
 Time\_ 17.58 h  
 INSTRUM Avance NEO - CUTN  
 PROBHD Z116098\_0822 ( )  
 PULPROG zg30  
 TD 65536  
 SOLVENT CDC13  
 NS 16  
 DS 2  
 SWH 8196.722 Hz  
 FIDRES 0.250144 Hz  
 AQ 3.9976959 sec  
 RG 101  
 DW 61.000 usec  
 DE 13.54 usec  
 TE 295.2 K  
 D1 1.00000000 sec  
 TDO 1  
 SFO1 400.3324720 MHz  
 NUC1 1H  
 PO 3.33 usec  
 P1 10.00 usec  
 PLW1 17.86800003 W

F2 - Processing parameters  
 SI 65536  
 SF 400.3300097 MHz  
 WDW EM  
 SSB 0  
 LB 0.30 Hz  
 GB 0  
 PC 1.00

Fig. S38  $^1\text{H}$  NMR Spectrum of compound, 18 ( $\text{CDCl}_3+\text{DMSO}-d_6$ , 400 MHz)

TMD-RJ-01-07

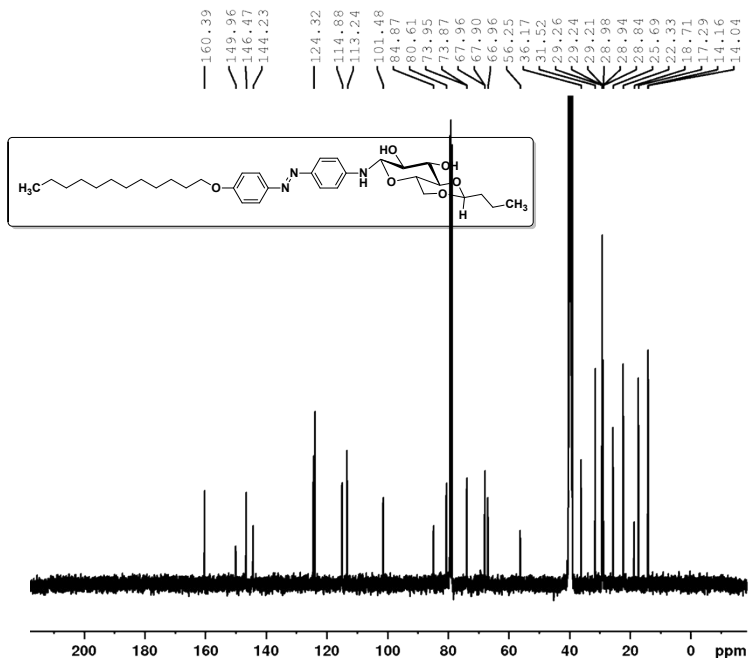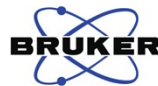

Current Data Parameters  
 NAME TMD-RJ-01-07  
 EXPNO 2  
 PROCNO 1

F2 - Acquisition Parameters  
 Date\_ 20200226  
 Time\_ 8.35 h  
 INSTRUM Avance NEO - CUTN  
 PROBHD Z116098\_0822 ( )  
 PULPROG zgpg30  
 TD 65536  
 SOLVENT DMSO  
 NS 4072  
 DS 4  
 SWH 23809.523 Hz  
 FIDRES 0.726609 Hz  
 AQ 1.3762560 sec  
 RG 44.1803  
 DW 21.000 usec  
 DE 6.50 usec  
 TE 296.0 K  
 D1 2.00000000 sec  
 D11 0.03000000 sec  
 TDO 1  
 SFO1 100.6731253 MHz  
 NUC1 13C  
 PO 3.33 usec  
 P1 10.00 usec  
 PLW1 74.77500153 W  
 SFO2 400.3316013 MHz  
 NUC2 1H  
 CPDPRG2 waltz65  
 PCPD2 90.00 usec  
 PLW2 17.86800003 W  
 PLM12 0.22059000 W  
 PLM13 0.11096000 W

F2 - Processing parameters  
 SI 32768  
 SF 100.6630864 MHz  
 WDW EM  
 SSB 0  
 LB 1.00 Hz  
 GB 0  
 PC 1.40

Fig. S39  $^{13}\text{C}$  NMR Spectrum of compound, 18 ( $\text{CDCl}_3+\text{DMSO}-d_6$ , 100 MHz)

TMD-RJ-01-07

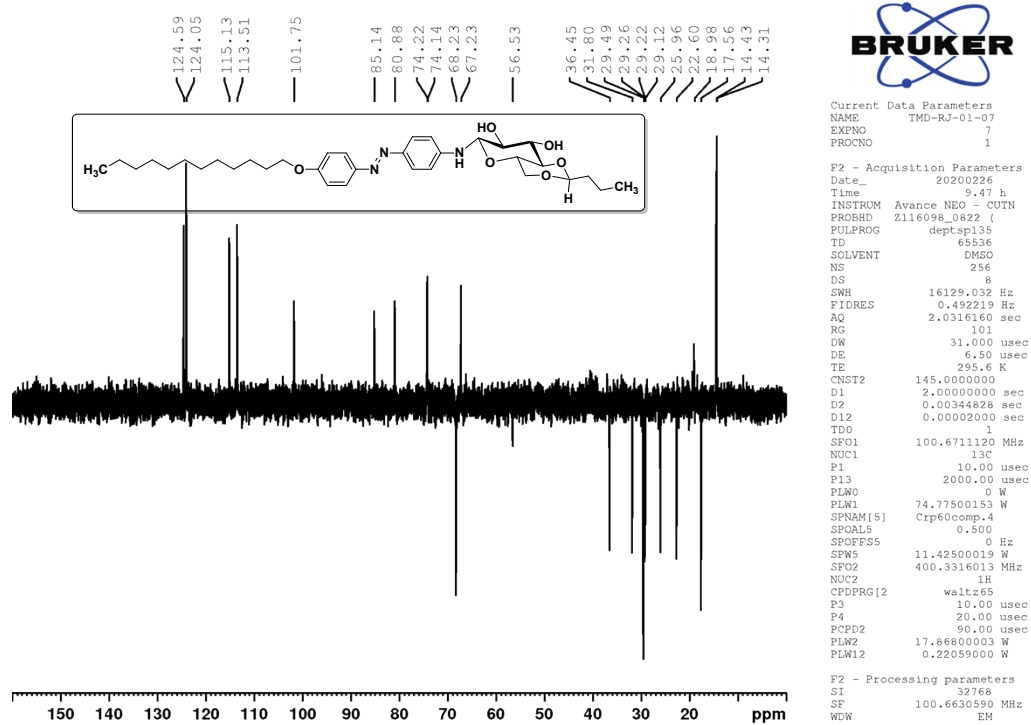

Fig. S40 DEPT-135 Spectrum of compound, 18

07 #110-147 RT: 1.09-1.44 AV: 19 NL: 5.20E5

T: FTMS + p ESI Full ms [150.0000-1500.0000]

598.38559  
C<sub>34</sub>H<sub>52</sub>O<sub>3</sub>N<sub>3</sub> = 598.38506  
0.87478 ppm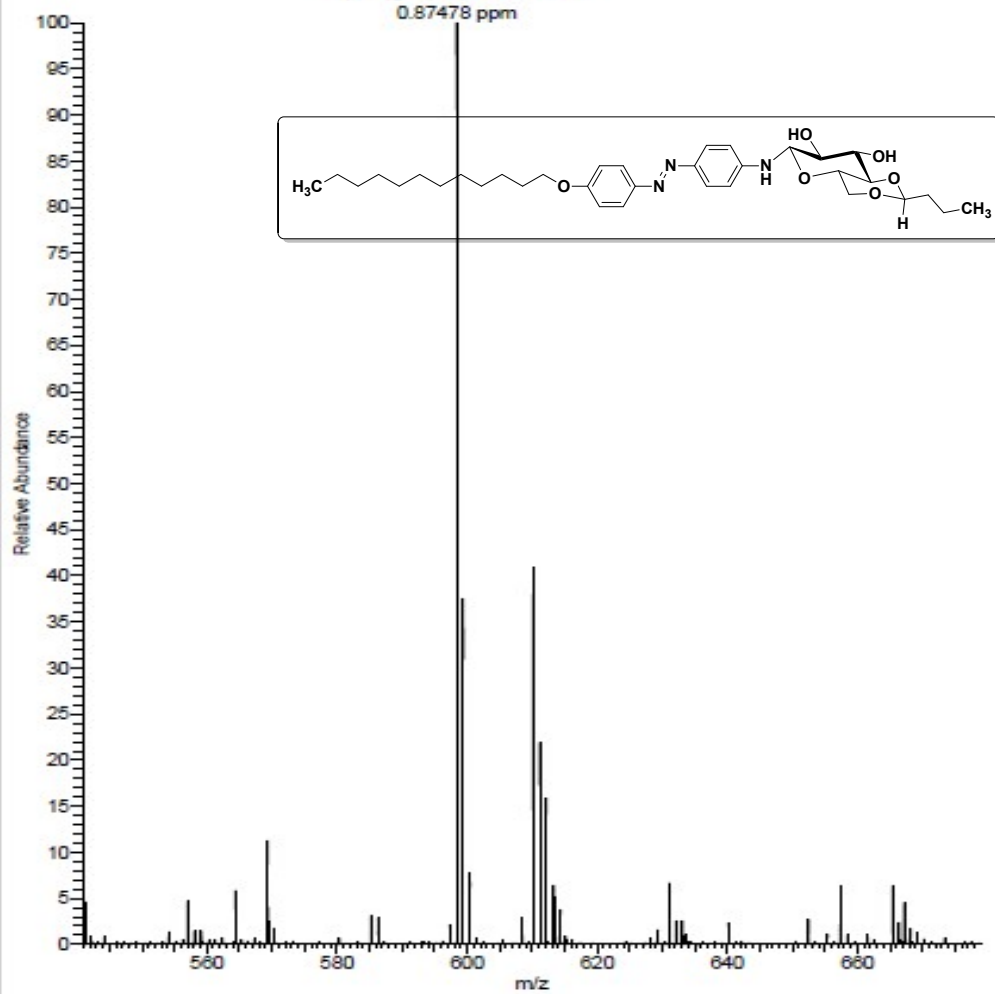

Fig. S41 HR-MS Spectrum of compound, 18

TMD-RJ-01-08

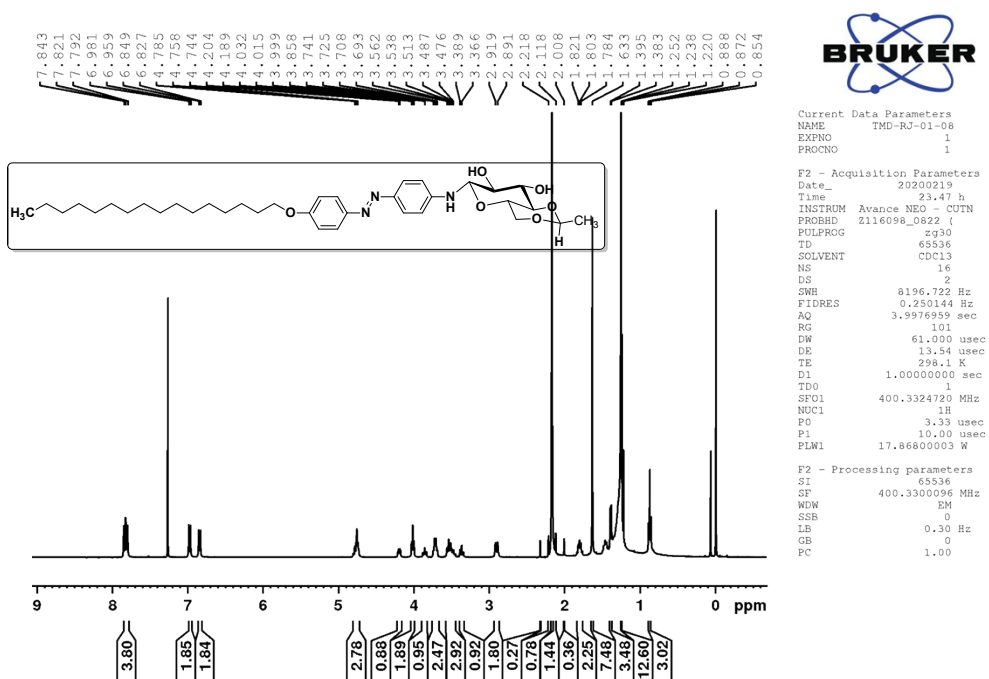

Fig. S42 <sup>1</sup>H NMR Spectrum of compound, 19 (CDCl<sub>3</sub>+DMSO-*d*<sub>6</sub>, 400 MHz)

TMD-RJ-01-08

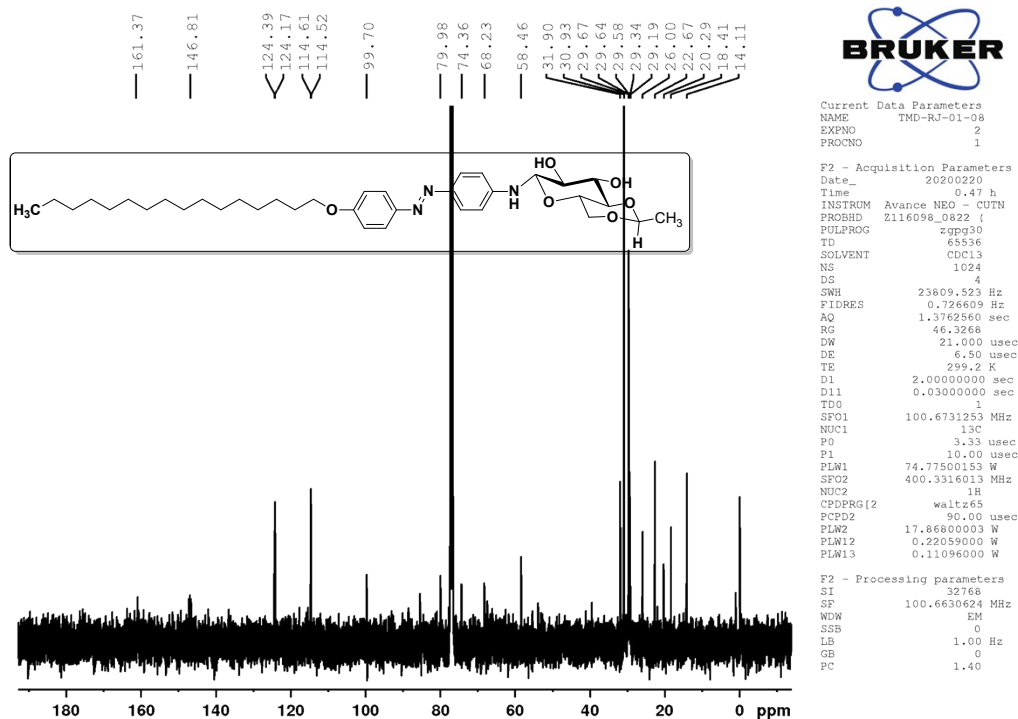

Fig. S43 <sup>13</sup>C NMR Spectrum of compound, 19 (CDCl<sub>3</sub>+DMSO-*d*<sub>6</sub>, 100 MHz)

TMD-RJ-01-08

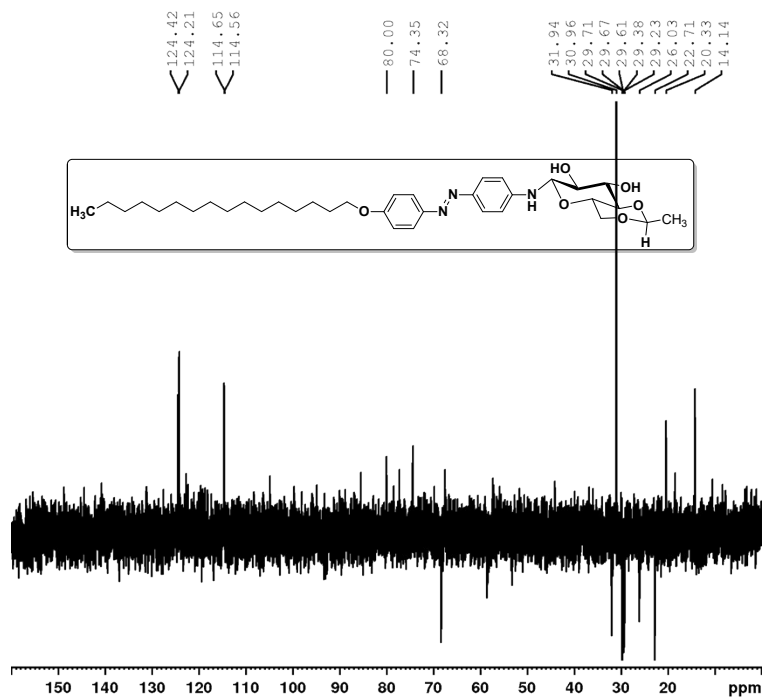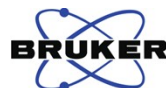

Current Data Parameters  
NAME TMD-RJ-01-08  
EXPNO 3  
PROCNO 1

F2 - Acquisition Parameters  
Date\_ 20200220  
Time 1.06 h  
INSTRUM Avance NEO - CUTN  
PROBHD Z116098\_0822 {  
PULPROG dept-spl35  
TD 65536  
SOLVENT CDCl3  
NS 256  
DS 8  
SWH 16129.032 Hz  
FIDRES 0.492219 Hz  
AQ 2.0316160 sec  
RG 101  
DW 31.000 usec  
DE 6.50 usec  
TE 299.4 K  
CNST2 145.0000000  
D1 2.00000000 sec  
D2 0.00344828 sec  
D12 0.00002000 sec  
TD0 1  
SFO1 100.6711120 MHz  
NUC1 13C  
P1 10.00 usec  
PI3 2000.00 usec  
PLW0 0 W  
PLW1 74.77500153 W  
SPNAM[5] Cxp60comp.4  
SPOALS 0.500  
SPOFFS5 0 Hz  
SPW5 11.42500019 W  
SFO2 400.3316013 MHz  
NUC2 1H  
CPDPRG[2] waltz65  
P3 10.00 usec  
P4 20.00 usec  
PCPD2 90.00 usec  
PLW2 17.86800003 W  
PLW12 0.22059000 W

F2 - Processing parameters  
SI 32768  
SF 100.6630590 MHz  
WDW EM  
SSB 0  
LB 1.00 Hz  
GB 0  
PC 1.40

Fig. S44 DEPT-135 Spectrum of compound, 19



08 #109-129 RT: 1.07-1.27 AV: 11 NL: 1.90E6  
T: FTMS + p ESI Full ms [150.0000-1500.0000]

626.41632  
C<sub>36</sub> H<sub>56</sub> O<sub>6</sub> N<sub>3</sub> = 626.41636  
-0.06240 ppm

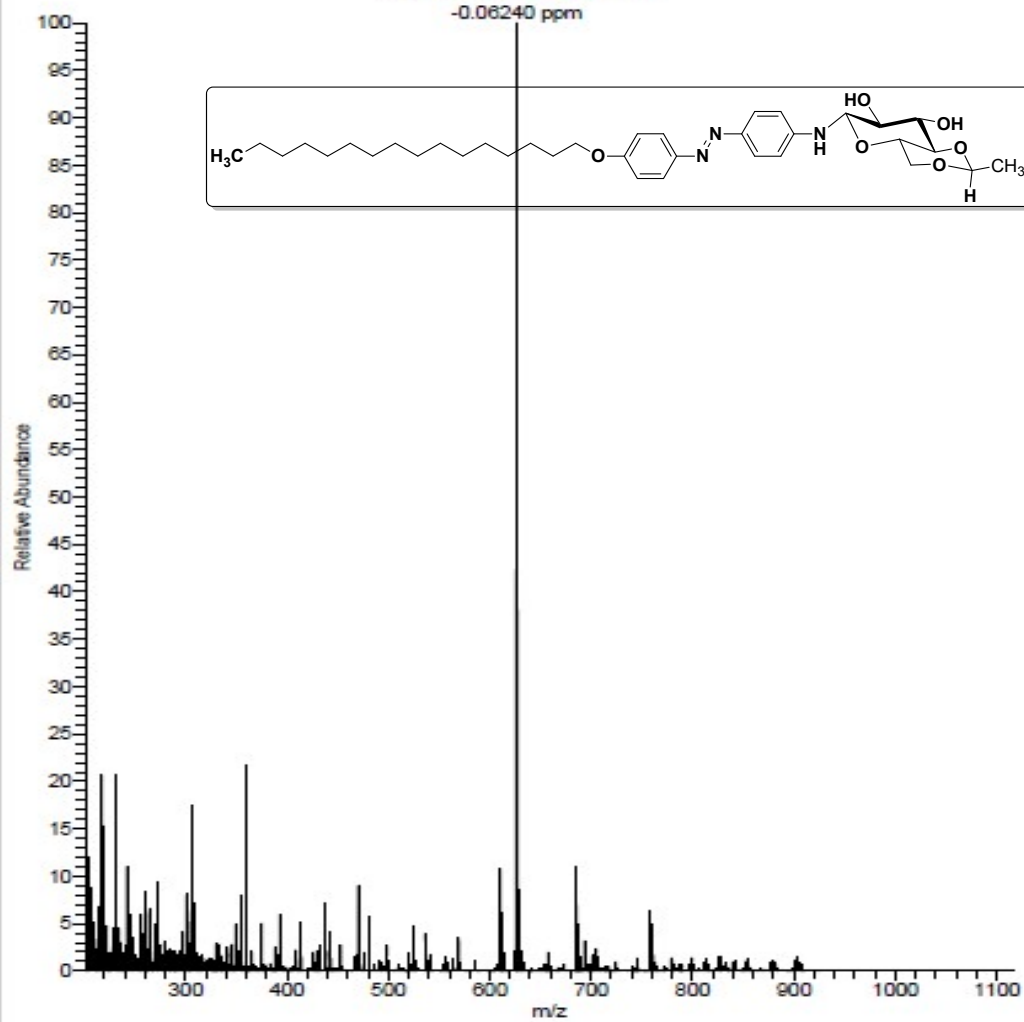

Fig. S45 HR-MS Spectrum of compound, 19

TMD RJ-01-09

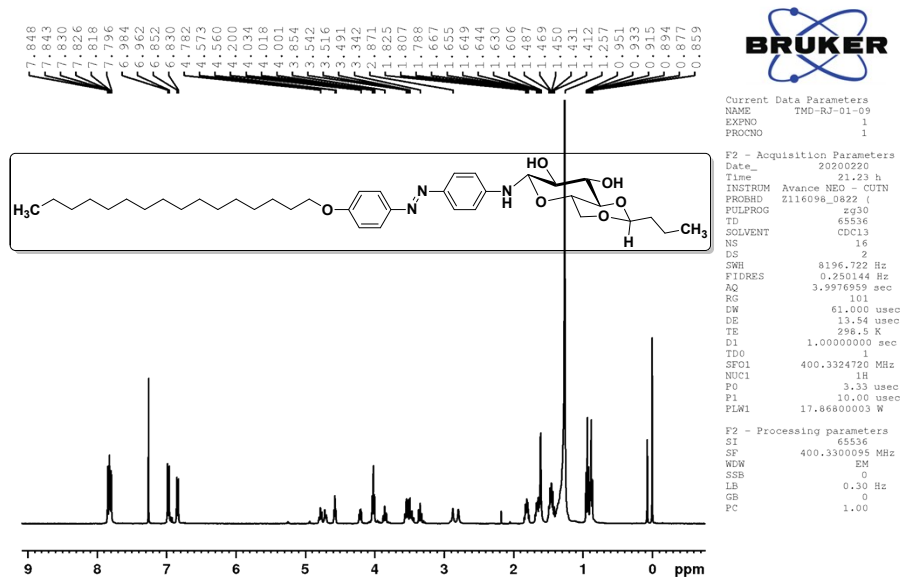

Fig.S46 <sup>1</sup>H NMR Spectrum of compound, 20 (CDCl<sub>3</sub>+DMSO- *d*<sub>6</sub>, 400 MHz)

TMD RJ-01-09

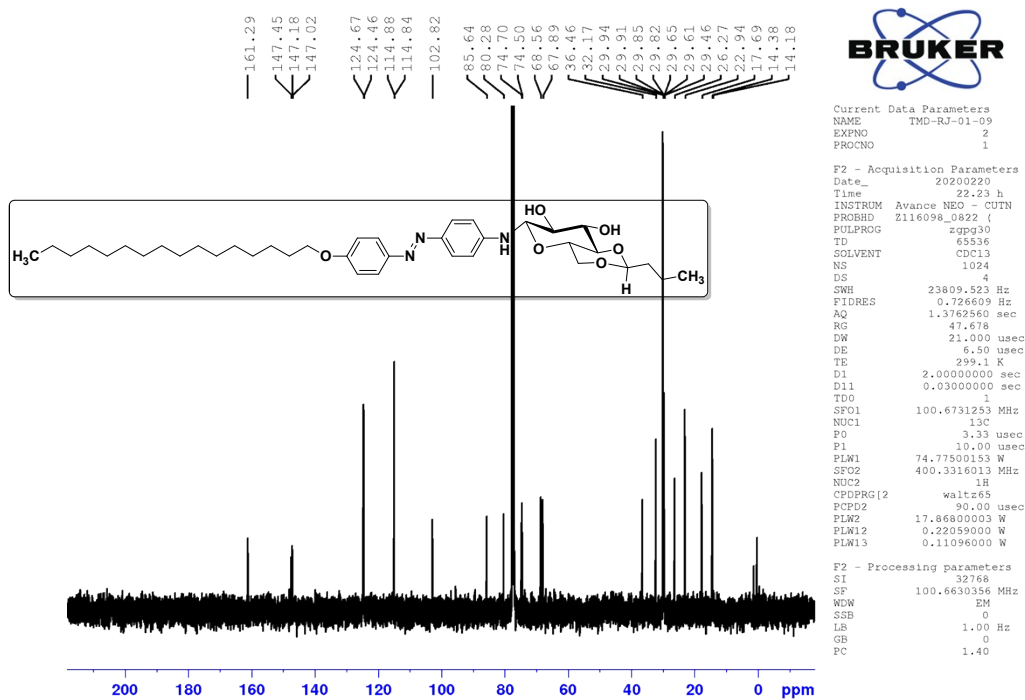

Fig. S47 <sup>13</sup>C NMR Spectrum of compound, 20 (CDCl<sub>3</sub>+DMSO- *d*<sub>6</sub>, 100 MHz)

09 #29-56 RT: 0.28-0.54 AV: 14 NL: 6.74E6  
T: FTMS + p ESI Full ms [150.0000-1500.0000]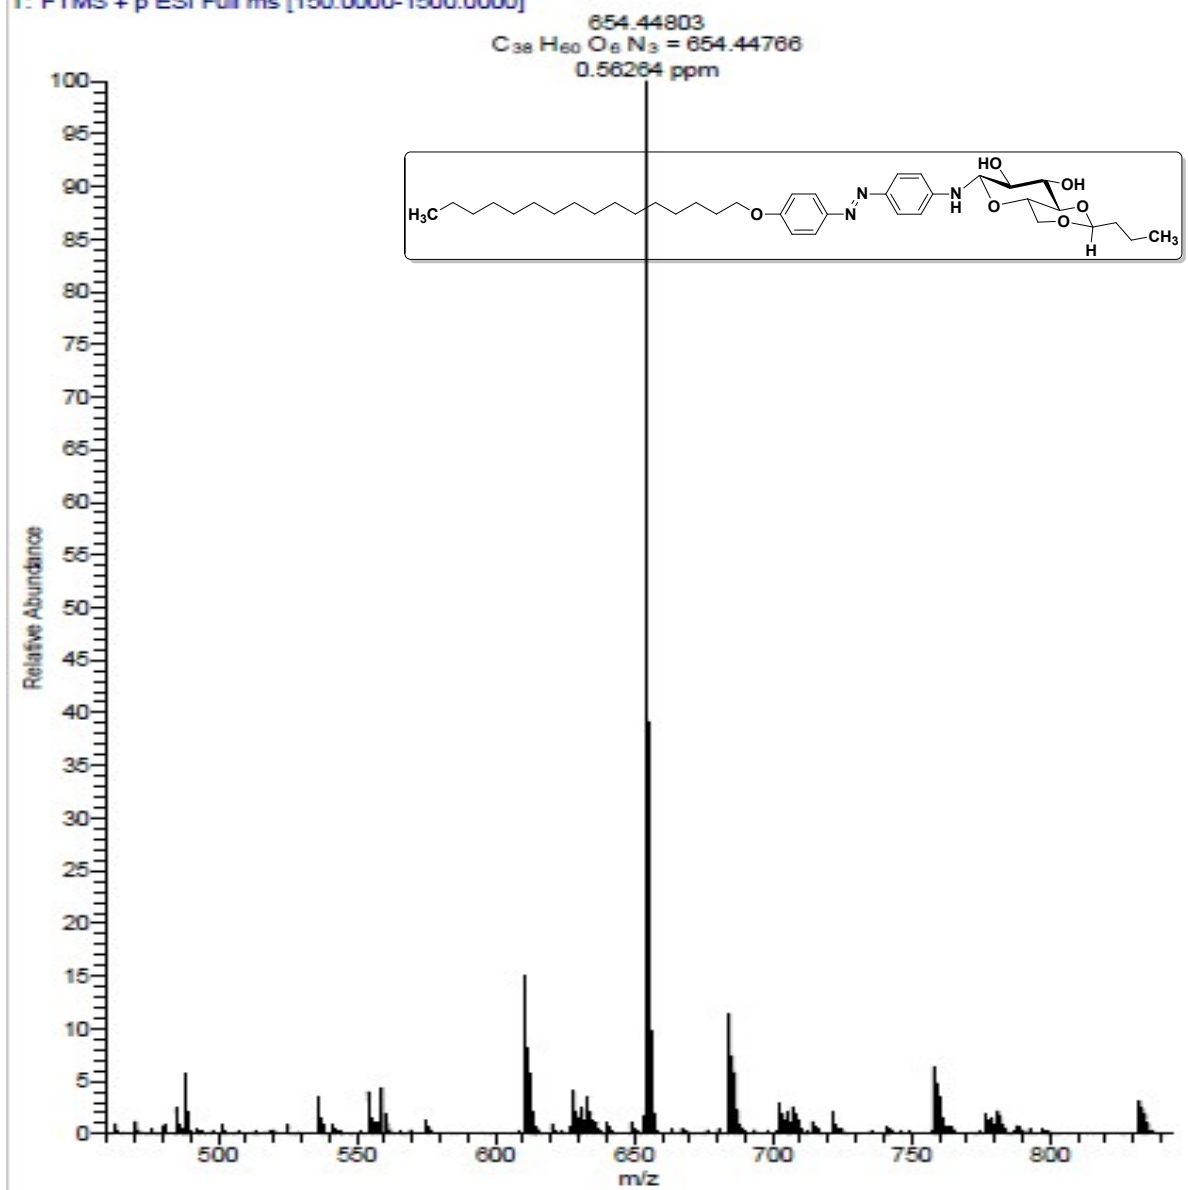

Fig. S48 HR-MS Spectrum of compound, 20
